# Supplementary material
Source: PubMed Central journal article supplement (PMC5396549)
Supplement: 10-1055-s-0035-1557924-sup_gf974.pdf [file 10-1055-s-0035-1557924-sup_gf974.pdf]

# Diagnostik und Therapie hypertensiver Schwangerschaftserkrankungen. Leitlinie der DGGG (S1-Level, AWMF-Registernummer 015/018, Dezember 2013)

Diagnosis and Treatment of Hypertensive Pregnancy Disorders.  
Guideline of DGGG (S1-Level, AWMF Registry No. 015/018, December 2013)

**Autoren** H. Stepan<sup>1</sup>, S. Kuse-Föhl<sup>2</sup>, W. Klockenbusch<sup>3</sup>, W. Rath<sup>4</sup>, B. Schauf<sup>5</sup>, T. Walther<sup>6</sup>, D. Schlembach<sup>7</sup>

**Institute** Die Institutsangaben sind am Ende des Beitrags gelistet.

## Schlüsselwörter

- Präeklampsie
- Hypertonie
- HELLP-Syndrom

## Key words

- preeclampsia
- hypertension
- HELLP syndrome

## Zusammenfassung

**Ziel:** Offizielle Leitlinie, publiziert und koordiniert von der Deutschen Gesellschaft für Gynäkologie und Geburtshilfe (DGGG). Hypertensive Schwangerschaftserkrankungen verursachen weltweit einen hohen Anteil an der neonatalen und mütterlichen Morbidität und Mortalität. Auch in Deutschland tragen sie wesentlich zu Krankenhauseinweisungen während der Schwangerschaft, iatrogenen Frühgeburtlichkeit und kardiovaskulärer Langzeitmorbidität bei.

**Methoden:** Mitglieder der beteiligten Fachgesellschaften entwickeln in einem informellen Prozess einen Konsensus. Anschließend bestätigen die Direktorien der Fachgesellschaften diesen Konsensus.

**Empfehlungen:** In der Leitlinie wird der aktuelle Standard für die Benennung, Früherkennung, Diagnostik, Behandlung und Nachsorge hypertensiver Schwangerschaftserkrankungen gegeben.

## Abstract

**Purpose:** Official guideline published and coordinated by the German Society of Gynecology and Obstetrics (DGGG). Hypertensive pregnancy disorders contribute significantly to perinatal as well as maternal morbidity and mortality worldwide. Also in Germany these diseases are a major cause for hospitalization during pregnancy, iatrogenic preterm birth and long-term cardiovascular morbidity.

**Methods:** This S1-guideline is the work of an interdisciplinary group of experts from a range of different professions who were commissioned by DGGG to carry out a systematic literature search of positioning injuries. Members of the participating scientific societies develop a consensus in an informal procedure. Afterwards the directorate of the scientific society approves the consensus.

**Recommendations:** This guideline summarizes the state-of-art for classification, risk stratification, diagnostic, treatment of hypertensive pregnancy disorders.

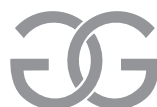

OEGGG

gynécologie  
suisse

## Bibliografie

**DOI** <http://dx.doi.org/10.1055/s-0035-1557924>  
Geburtsh Frauenheilk 2015; 75: 1–15 © Georg Thieme Verlag KG Stuttgart · New York · ISSN 0016-5751

## Korrespondenzadresse

**PD Dr. med.**

**Dietmar Schlembach**  
Klinik für Geburtsmedizin  
Vivantes Klinikum Neukölln  
Rudower Straße 48  
12351 Berlin  
dietmar.schlembach@vivantes.de

## I Leitlinieninformationen

### DGGG-Leitlinienprogramm

Informationen hierzu finden Sie am Ende der Leitlinie.

### Zitierweise

Diagnosis and treatment of hypertensive pregnancy disorders. Guideline of DGGG (S1-Level, AWMF Registry No.015/018, December 2013).  
Geburtsh Frauenheilk 2015; 75: 900–914

## Leitliniendokumente

Die vollständige Langfassung und eine DIA-Version dieser Leitlinien sowie eine Aufstellung der Interessenkonflikte aller Autoren befinden sich auf der Homepage der AWMF:

<http://www.awmf.org/leitlinien/detail/II/015-018.html>

## Autoren

Siehe ● **Tab. 1.**

Tab. 1 Autoren.

| Autor/in<br>Mandatsträger/in                          | DGGG-Arbeitsgemeinschaft/Fachgesellschaft/Organisation/Verein            |
|-------------------------------------------------------|--------------------------------------------------------------------------|
| <b>koordinierender Leitlinienautor:</b>               |                                                                          |
| Prof. Dr. Holger Stepan                               | Deutschen Gesellschaft für Gynäkologie und Geburtshilfe (DGGG)           |
| <b>weitere federführende Leitlinienautoren/innen:</b> |                                                                          |
| PD Dr. Dietmar Schlembach                             | AG Schwangerschaftshochdruck/Gestose e. V. der DGGG                      |
| <b>weitere Mitglieder der Arbeitsgruppe:</b>          |                                                                          |
| Sabine Kuse-Föhl                                      | Arbeitsgemeinschaft Gestose-Frauen e. V.                                 |
| Prof. Dr. med. Walter Klockenbusch                    | International Society for the Study of Hypertension in Pregnancy (ISSHP) |
| Prof. Dr. med. Werner Rath                            | International Society for the Study of Hypertension in Pregnancy (ISSHP) |
| Prof. Dr. med. Burkhard Schaaf                        | International Society for the Study of Hypertension in Pregnancy (ISSHP) |
| Prof. Dr. med. Thomas Walther                         | International Society for the Study of Hypertension in Pregnancy (ISSHP) |

## Abkürzungen

|        |                                                         |
|--------|---------------------------------------------------------|
| ACE    | Angiotensin converting Enzyme                           |
| ASS    | Acetylsalicylsäure                                      |
| BMI    | Body-Mass-Index                                         |
| CTG    | Cardiotocography                                        |
| DIG    | disseminierte intravasale Gerinnung                     |
| E      | Eklampsie                                               |
| EFCNI  | European Foundation for the Care of Newborn Infants     |
| FPR    | Rate falsch positiver Ergebnisse                        |
| HELLP  | Haemolysis elevated Liver Enzymes<br>low Platelet Count |
| K      | Korotkoff                                               |
| LR     | Likelihood Ratio                                        |
| MoM    | Multiple of th Median                                   |
| PAPP-A | Pregnancy-associated Plasma Protein A                   |
| PE     | Präeklampsie                                            |
| PIGF   | Placental Growth Factor                                 |
| PI     | Pulsatilitätsindex                                      |
| RI     | Resistance-Index                                        |
| RR     | relatives Risiko                                        |
| SSW    | Schwangerschaftswoche                                   |
| sFit-1 | lösliches Fragment des VEGF-Rezeptor-1                  |

## II Leitlinienverwendung

### Fragestellung und Ziele

Hypertensive Schwangerschaftserkrankungen tragen weltweit signifikant zu Morbidität und Mortalität von Mutter und Fetus bei. Auch in Deutschland sind diese Erkrankungen Hauptursache der Hospitalisierung während der Schwangerschaft, von iatrogenen Frühgeburten und langfristiger kardiovaskulärer Morbidität. Die Leitlinie fasst den State-of-Art der Klassifikation, Risikostratifizierung, Diagnostik und Behandlung von hypertensiven Schwangerschaftserkrankungen mit dem Ziel der Verminderung von sowohl perinataler als auch maternaler Morbidität und Mortalität zusammen.

### Versorgungsbereich

Ambulanter und stationärer Versorgungsbereich.

### Adressaten

Diese Leitlinie richtet sich an folgende Personenkreise:

- ▶ Geburtshelfer
- Patientenzielgruppe:
- ▶ Schwangere

## Gültigkeitsdauer

Die Gültigkeit dieser Leitlinie wurde durch die Vorstände/Verantwortlichen der beteiligten Fachgesellschaften/Arbeitsgemeinschaften/Organisationen/Vereine sowie durch den Vorstand der DGGG und der DGGG-Leitlinienkommission im November 2013 bestätigt und damit in ihrem gesamten Inhalt genehmigt. Diese Leitlinie besitzt eine Gültigkeitsdauer von 01.12.2013 bis 30.11.2016. Diese Dauer ist aufgrund der inhaltlichen Zusammenhänge geschätzt. Bei dringendem Bedarf kann eine Leitlinie früher aktualisiert werden, bei weiterhin aktuellem Wissensstand kann ebenso die Dauer verlängert werden.

## III Leitlinie

### 1 Methodik

Die Methodik zur Erstellung dieser Leitlinie wird durch die Vergabe der Stufenklassifikation vorgegeben. Das AWMF-Regelwerk (Version 1.0) gibt entsprechende Regelungen vor. Es wird zwischen der niedrigsten Stufe (S1), der mittleren Stufe (S2) und der höchsten Stufe (S3) unterschieden. Die niedrigste Klasse definiert sich durch eine Zusammenstellung von Handlungsempfehlungen, erstellt durch eine nicht repräsentative Expertengruppe. Im Jahr 2004 wurde die Stufe S2 in die systematische Evidenzrecherche-basierte (S2e) oder strukturelle konsensbasierte Unterstufe (S2k) gegliedert. In der höchsten Stufe S3 vereinigen sich beide Verfahren.

Diese Leitlinie entspricht der Stufe: S1

Die Leitlinie, die im November 1999 erstellt wurde und bereits in einer Vorversion aus dem Jahr 2008 vorlag, wurde der aktuellen Literatur und bestehenden internationalen Leitlinien angepasst. Die Inhalte der Leitlinie wurden von der gesamten Expertengruppe in 3 Arbeitstreffen in kontroverser Diskussion bearbeitet. Nach redaktioneller und inhaltlicher Überarbeitung der Leitlinie durch die Leitung der Expertengruppe erfolgte die Abstimmung zwischen den Autoren im schriftlichen Umlaufverfahren. Verabschiedet wurde eine Fassung, der alle Autoren zustimmten. Leitlinienkommission und Vorstand der DGGG stimmten der Leitlinie im November 2013 zu.

### 2 Einleitung

Hypertensive Erkrankungen treten in 6–8% aller Schwangerschaften auf, tragen zu 20–25% der perinatalen Mortalität bei und stehen in Europa an 1. bis 2. Stelle der mütterlichen Todesursachen. Dabei ist die Präeklampsie von besonderer Bedeutung (10–15% aller maternalen Todesfälle stehen in Zusammenhang mit einer Präeklampsie/Eklampsie), weltweit ist sie für mindes-

tens 70 000 mütterliche Todesfälle pro Jahr verantwortlich (Übersicht bei: Lo et al. [1]). Auch heute noch sind in Europa > 90% der maternalen Todesfälle durch PE/E potenziell vermeidbar [2, 3]. In Europa beträgt die Inzidenz der Präeklampsie ca. 2% [1, 4, 5].

### 3 Klassifizierung hypertensiver Erkrankungen in Schwangerschaft und Wochenbett

Die folgende Einteilung wie auch die Definitionen berücksichtigen Empfehlungen amerikanischer und australischer Fachgesellschaften sowie der International Society for the Study of Hypertension in Pregnancy [6–11].

#### 3.1 Gestationshypertonie

**Definition:** Nach der abgeschlossenen 20. SSW auftretende Blutdruckwerte  $\geq 140/90$  mmHg ohne Proteinurie bei einer zuvor normotensiven Schwangeren.

**Cave:** In bis zu 46% der Fälle entwickelt sich aus einer Gestationshypertonie eine milde und in 9,6% eine schwere Präeklampsie [12].

#### 3.2 Präeklampsie (Synonym: Gestose)

**Definition:** Gestationshypertonie und Proteinurie ( $\geq 300$  mg/24 h nachgewiesen im 24-h-Sammelurin oder  $> 30$  mg/mmol Protein-Kreatinin-Ratio im Spontanurin), die nach der abgeschlossenen 20. SSW aufgetreten sind.

**Cave:** Die klinischen Symptome Nierenfunktionseinschränkung, Leberbeteiligung, Lungenödem, hämatologische/neurologische Störungen oder fetale Wachstumsrestriktion weisen auf die Entwicklung einer Präeklampsie hin.

Aufgrund der unterschiedlichen Pathophysiologie und des unterschiedlichen Risikoprofils für Mutter und Kind wird zwischen früher (early-onset – Manifestation  $< 34$ . SSW) und später (late-onset) Präeklampsie unterschieden [13, 14].

Eine Präeklampsie wird als schwere Präeklampsie bezeichnet, wenn zusätzlich mindestens eines der folgenden Kriterien erfüllt wird [8, 11, 15]:

- ▶ Blutdruck  $\geq 160/110$  mmHg
- ▶ Nierenfunktionseinschränkung (Kreatinin  $\geq 79,6$   $\mu\text{mol/l}$  [entspricht 0,9 mg/dl] oder Oligurie  $< 500$  ml/24 h)
- ▶ Leberbeteiligung (Transaminasenanstieg, persistierende Oberbauchschmerzen)
- ▶ Lungenödem
- ▶ hämatologische Störungen (Thrombozytopenie  $< 100$  Gpt/l, Hämolyse)
- ▶ neurologische Symptome (starke Kopfschmerzen, Sehstörungen)
- ▶ fetale Wachstumsrestriktion (fetales Schätzwert  $< 5$ . Perzentile und/oder pathologischer Doppler der A. umbilicalis)

Das Ausmaß der Proteinurie ist kein Kriterium mehr für die Definition einer schweren Präeklampsie [11, 15].

#### 3.3 Eklampsie

**Definition:** Im Rahmen einer Präeklampsie auftretende tonisch-klonische Krampfanfälle, die keiner anderen Ursache zugeordnet werden können.

**Cave:** Nur in etwa 50% mit schwerer Hypertonie assoziiert und selbst bei fehlender Hypertonie oder Proteinurie möglich (14–34% der Fälle) [16, 17]. In der Woche vor Manifestation einer Präeklampsie weisen 21% der Frauen keine klinischen Symptome auf [18].

#### 3.4 HELLP-Syndrom

**Definition:** Trias aus:

**(H):** hemolysis (Hämolyse)

**(EL):** elevated liver enzymes (pathologisch erhöhte Leberenzyme)

**(LP):** low platelets (Thrombozytopenie [ $< 100$  Gpt/l])

**Cave:** In 5–15% liegt keine signifikante Proteinurie und in bis zu 20% der Fälle keine Hypertonie vor, wobei auch gleichzeitig Hypertonie *und* Proteinurie fehlen können [19].

#### 3.5 Chronische Hypertonie

**Definition:** Präkonzeptionell oder in der 1. Schwangerschaftshälfte (vor der 20. SSW) diagnostizierte Hypertonie  $\geq 140/90$  mmHg [20].

#### 3.6 Pfropfpräeklampsie (Synonym: Propfgestose)

**Definition:** Chronische Hypertonie *und* neu aufgetretene/sich verschlechternde Proteinurie nach der 20. SSW oder Auftreten klinischer oder laborchemischer Merkmale der schweren Präeklampsie (s. o.).

**Cave:** In 17–25% entwickelt sich eine Pfropfpräeklampsie aus einer chronischen Hypertonie (50% davon vor der 34. SSW) [20].

### 4 Screening, Prädiktion und Prävention

Ein aussagekräftiger, alleiniger Test zur sicheren Früherkennung der Präeklampsie steht bislang nicht zur Verfügung [4, 21–26]. Zur Risikoabschätzung können im I. oder II. Trimenon anamnestic Angaben (Mutterpass), mittlerer arterieller Blutdruck, biochemische Marker und Doppler-Sonografie herangezogen werden [27].

#### 4.1 Screening im I. Trimenon

Die A-priori-Risikoerfassung aus maternalen Charakteristika (Alter, Anamnese, Body-Mass-Index, ethnische Zugehörigkeit) erlaubt in Verbindung mit biophysikalischen Faktoren (nach MoM adjustiertem Pulsatilitätsindex der Aa. uterinae, des mittleren arteriellen Blutdrucks) sowie biochemischen Risikomarkern (z. B. pregnancy-associated plasma protein A [PAPP-A], placental growth factor [PlGF]) eine individuelle Risikokalkulation, insbesondere der Early-Onset-Präeklampsie. Mit dieser Kombination verschiedener Methoden werden Erkennungsraten für eine frühe Präeklampsie von 93,4 bzw. 95,2% erreicht bei einer Rate falsch positiver Ergebnisse (FPR) von 5 bzw. 10%. Für die späte Präeklampsie zeigt dieser Algorithmus jedoch deutlich schlechtere Erkennungsraten von 37,8 bzw. 71,1% [5, 28].

Der prädiktive Wert der einzelnen biophysikalischen und biochemischen Methoden als alleiniger Screeningtest ist gering, ihre Anwendung wegen der hohen FPR daher für die Prädiktion der Präeklampsie nicht zu empfehlen [4, 5, 24, 28–32]. Hervorzuheben ist allerdings der hohe negative Vorhersagewert ( $> 97\%$ ) dieses Testverfahrens für die Early-Onset-Präeklampsie oder die Entwicklung einer intrauterinen Wachstumsrestriktion [30, 33, 34]. Regionale Unterschiede sowie sozioökonomische und ethnische Faktoren können die Ergebnisse und deren Aussagekraft beeinflussen [35, 36], weswegen deren unkritische Übernahme in die klinische Routine (vor allem ohne geeignete Organisationsstrukturen und adäquate Beratung) nicht zu empfehlen ist [37].

#### 4.2 Screening und Prädiktion im II. Trimenon

Die Bestimmung des mittleren Pulsatilitäts-Index (PI) – alleine oder in Kombination mit der postsystolischen Inzisierung (notching) – gilt als bester Marker für die Prädiktion einer Präeklampsie mit einer Sensitivität von bis zu 93% [22, 23, 38–40], in einem Nied-

rigrisikokollektiv beträgt die Erkennungsrate des mittleren Pulsatilitätsindex > 1,6 (95. Perzentile) für die Early-Onset-Präeklampsie bei 5% FPR 78% und für die Präeklampsie insgesamt 42,8% [22]. Die Erkennungsraten für eine späte Präeklampsie sind jedoch in Abhängigkeit vom Gestationsalter deutlich niedriger [22]. Von klinischer Relevanz ist auch hier die hohe Spezifität und der negative Vorhersagewert dieser dopplersonografischen Parameter von bis zu 99% [38,39,41,42]. Die Darstellung der postsystolischen Inzisur (notching) der Aa. uterinae ist ein zuverlässiges Zeichen beim Screening auf Präeklampsie, dessen Fehlerquote aufgrund einer gewissen Subjektivität jedoch leider hoch ist.

Durch die Bestimmung von Angiogenese-/Antiangiogenesefaktoren ist bei pathologischem Uterinadoppler im II. Trimenon eine weitere Risikokondensierung für die Entwicklung einer Präeklampsie und eine prognostische Abschätzung des klinischen Verlaufs der Erkrankung zu erreichen [22,23,25,42–45]. Es konnte gezeigt werden, dass sich die Serumspiegel von sFlt-1 (lösliches Fragment des VEGF-Rezeptor-1) und PlGF bereits Wochen vor Manifestation der Erkrankung verändern und die sFlt-1/PlGF-Ratio prognostische Wertigkeit aufweist [43,46–50].

#### 4.3 Prävention

Die derzeit einzige effektive Prävention der Präeklampsie bei Frauen mit Risikofaktoren (z.B. schwere Präeklampsie in der Anamnese) besteht in einer ab der Frühschwangerschaft (bis spätestens 16. SSW) beginnenden oralen Einnahme von niedrig dosierter Acetylsalicylsäure (ASS: 75–150 mg/d) [51]. Dieses Vorgehen senkt signifikant das Risiko für eine Präeklampsie vor der 37. SSW, nicht aber in Terminnähe [52], sowie das Risiko für eine (schwere) Präeklampsie, Gestationshypertonie und IUGR bei pathologischem Dopplerbefund der Aa. uterinae [53].

In Deutschland hat sich inzwischen eine ASS-Dosierung von 100 mg/d bis zur 34+0 SSW etabliert. Eine generelle ASS-Prophylaxe ist nicht indiziert.

## 5 Untersuchungen in der Schwangerenvorsorge

### 5.1 Risikofaktoren für die Entwicklung einer Präeklampsie

#### 5.1.1 Anamnestische Risikofaktoren (● Tab. 2) [39,54–62]

**Tab. 2** Anamnestische Risikofaktoren.

|                                        | relatives Risiko (RR) |
|----------------------------------------|-----------------------|
| Antiphospholipidsyndrom                | ~ 9                   |
| Z. n. Präeklampsie                     | ~ 7                   |
| Body-Mass-Index > 30                   | ~ 3–5                 |
| vorbestehender Diabetes mellitus       | ~ 3,5                 |
| familiäre Belastung                    | ~ 3                   |
| vorbestehende Nierenerkrankung         | ~ 3                   |
| Erstparität                            | ~ 2,5–3               |
| Alter > 40                             | ~ 2                   |
| chronische Hypertonie                  | ↑                     |
| ▶ mit 1 zusätzlichen Risikofaktor      | 1,55                  |
| ▶ mit 2 zusätzlichen Risikofaktoren    | 3                     |
| ▶ RR diastol. > 110 mmHg (< 20 Wochen) | 3,2                   |
| Autoimmunerkrankungen                  | 7–9,7                 |
| Ethnizität (afroamerikanisch)          | 2                     |

### 5.1.2 Schwangerschaftsassozierte Risikofaktoren

(● Tab. 3) [39,56,59,62]

**Tab. 3** Schwangerschaftsassozierte Risikofaktoren.

|                                                                                      | relatives Risiko (RR)/<br>Likelihood Ratio (LR) |
|--------------------------------------------------------------------------------------|-------------------------------------------------|
| bilaterales Notching/<br>erhöhter PI/RI der Aa. uterinae<br>persistierende > 24. SSW | LR 3,4–6,5                                      |
| Mehrlingsschwangerschaft                                                             | RR 3                                            |
| IVF/Eizellspende                                                                     | RR ↑                                            |
| Gestationsdiabetes                                                                   |                                                 |
| Hydrops fetalis, Trisomien, Blasenmole                                               |                                                 |

### 5.1.3 Wiederholungsrisiko

Das Wiederholungsrisiko für Präeklampsie nach einer vorangegangenen Präeklampsie liegt bei 11,5–27% [63], im Mittel bei 14–16% [64–66], nach 2 vorangegangenen Präeklampsien bei 32% [66]. Nach vorangegangener Gestationshypertonie wird das Wiederholungsrisiko für die gleiche Erkrankung in der Folgeschwangerschaft mit 16–47% und für eine Präeklampsie mit 2–7% angegeben [11,64].

Das Wiederholungsrisiko für das Auftreten eines HELLP-Syndroms nach vorausgegangenem HELLP-Syndrom beträgt in Deutschland 12,8% [67].

Nach einer Eklampsie besteht ein Wiederholungsrisiko für eine Eklampsie in der Folgeschwangerschaft von 2–16% und für eine Präeklampsie von 22–35% [68].

Das Wiederholungsrisiko sowie die Prognose ist vor allem vom Gestationsalter der Manifestation ( $\leq 28$ . SSW: 38,6%; 29.–32. SSW: 29,1%; 33.–36. SSW: 21,9%;  $\geq 37$ . SSW: 12,9%) und dem Schweregrad der Präeklampsie in der vorangegangenen Schwangerschaft (Wiederholungsrisiko 25% nach schwerer Präeklampsie, HELLP-Syndrom oder Eklampsie vor der 34. SSW und von 55% bei schwerer Präeklampsie vor der 28. SSW) sowie von anderen Begleitfaktoren (z.B. erhöhter BMI) oder -erkrankungen abhängig [65].

**Case:** Nach einer Präeklampsie/einem HELLP-Syndrom ist auch das Risiko für das Auftreten anderer hypertensiver Erkrankungen in der Schwangerschaft erhöht.

### 5.2 Blutdruckmessung

Der diastolische Blutdruck sollte als Korotkoff 5 (K5 = Verschwinden des Tones) oder Korotkoff 4 (Leiserwerden) – wenn K5 nicht messbar – registriert werden [69–71]. Die Messung sollte manuell mit an den Oberarmumfang adaptierten Manschetten durchgeführt werden [7,72]. Die 1. Messung sollte nach einer 2 bis 3-minütigen Ruhephase bei der sitzenden Patientin erfolgen [7]. Die Messung sollte primär an beiden Armen und später – bei geringen Differenzen – am rechten Arm gemessen werden.

Die 24-Stunden-Blutdruckmessung ist eine geeignete Methode, um einen Bluthochdruck in der Schwangerschaft weiter differenzialdiagnostisch abzuklären (Ausschluss „white coat hypertension“, Verlust des zirkadianen Rhythmus als prognostisch ungünstiges Zeichen) und um den Erfolg antihypertensiver Maßnahmen zu überprüfen [69,70].

**Case:** Frauen mit „white coat hypertension“ in der Frühschwangerschaft können in bis zu 40% der Fälle eine Gestationshypertonie und in 8% eine Präeklampsie im weiteren Verlauf der Schwangerschaft entwickeln [73].



Für die weitere ambulante Betreuung der Schwangeren ist eine Blutdruckselbstmessung (mindestens morgens und abends) mittels Oberarmmessgerät und die Erstellung eines Blutdruckprofils zu empfehlen.

**Cave:** Automatische Blutdruckmessgeräte sind hierfür geeignet, v. a. aber Handgelenksgeräte können den Blutdruck systematisch niedriger messen [74, 75].

### 5.3 Eiweißausscheidung im Urin (Proteinurie)

Der Nachweis von  $\geq 1+$  Eiweiß im Urin-Schnelltest ist als abklärungsbedürftig anzusehen.

Bei allen Patientinnen mit De-novo-Hypertension in der Schwangerschaft sollte eine quantitative Eiweißbestimmung im Urin erfolgen [11, 76–78]. Eine Proteinurie vor der 20. SSW gilt als Hinweis auf eine präexistente Nierenerkrankung [79].

Als mögliche diagnostische Kriterien stehen zur Verfügung:

- ▶ Protein-Kreatinin-Quotient (aus Spontanurin) [11, 80–83]: Werte  $\geq 30$  mg/mmol zeigen eine signifikante Proteinurie (entsprechend  $\geq 300$  mg/d) an und korrelieren mit einer Eiweißausscheidung  $\geq 300$  mg/d. Die Verwendung von Katheterurin ist nicht notwendig [84].
- ▶ Eiweißausscheidung im 24-Stunden-Sammelurin ( $\geq 300$  mg/d) [11, 72, 78, 85].

**Cave:** Bei nachgewiesener Proteinurie sind wiederholte Messungen zur Abschätzung der Prognose bzw. Verlaufskontrolle der Präeklampsie nicht sinnvoll [11, 78].

### 5.4 Ödeme

Ödeme allein sind ein uncharakteristisches Symptom, das nur dann von Bedeutung ist, wenn die Ödeme rasch zunehmen, d. h. wenn eine deutliche Gewichtszunahme innerhalb von kurzer Zeit ( $\geq 1$  kg/Woche im III. Trimenon) [86] festgestellt wird oder ein ausgeprägtes Gesichtsoedem besteht. Bei einer raschen Ödem-entstehung/Gewichtszunahme kann es in Verbindung mit einer Proteinurie auch ohne Hypertonie zur Eklampsie kommen (vgl. Definition der Präeklampsie).

## 6 Ambulante und klinische Überwachung

### 6.1 Klinisch-chemische und hämatologische Untersuchungen

Folgende klinisch-chemische/hämatologische Parameter können erkrankungstypisch verändert sein (► **Tab. 4**) [6–11, 49, 87–91]:

**Tab. 4** Klinisch-chemische Laborparameter.

| Parameter                                                                                                                                        |                                       |
|--------------------------------------------------------------------------------------------------------------------------------------------------|---------------------------------------|
| Hämoglobin                                                                                                                                       | $> 13$ g/dl = $> 8,0$ mmol/l          |
| Hämatokrit                                                                                                                                       | $> 38\%$                              |
| Thrombozyten                                                                                                                                     | $< 100$ Gpt/l                         |
| Ein progredienter Abfall der Thrombozyten muss auch im Normwertbereich innerhalb weniger Stunden kontrolliert werden (Cave: HELLP-Syndrom, DIG). |                                       |
| GPT (ALT)                                                                                                                                        | Anstieg über Normbereich              |
| GOT (AST)                                                                                                                                        | Anstieg über Normbereich              |
| LDH                                                                                                                                              | Anstieg über Normbereich              |
| Bilirubin (indirekt)                                                                                                                             | $> 1,2$ mg/dl = $> 20,5$ $\mu$ mol/l  |
| Harnsäure                                                                                                                                        | $> 5,9$ mg/dl = $350$ $\mu$ mol/l     |
| Kreatinin                                                                                                                                        | $\geq 0,9$ mg/dl = $79,6$ $\mu$ mol/l |
| Eiweiß im Urin                                                                                                                                   | $\geq 300$ mg/24 h                    |
| Haptoglobin                                                                                                                                      | Abfall unter Normbereich              |
| andere Blutgerinnungsteste (z. B. rapider D-Dimer-Anstieg (Hinweis für DIG)                                                                      | Verlaufsbeobachtung                   |
| PIGF                                                                                                                                             | gestationsaltersspezifischer Normwert |
| sFlt-1/PIGF-Quotient                                                                                                                             | $> 85$                                |

### 6.2 Ambulante Betreuung

Bei adäquater Kooperation der Schwangeren und ausgeschlossenen manifesten Risiken für Mutter und Kind sowie Gewährleistung wöchentlicher ärztlicher Kontrollen kann eine milde Gestationshypertonie ambulant betreut werden (u. a. häusliches Blutdruckprotokoll) [11, 92]. Neben körperlicher Schonung und der Ausschaltung zusätzlicher Stressfaktoren (evtl. Arbeitsunfähigkeit oder individuelles Arbeitsverbot) stehen regelmäßige Messungen des Blutdrucks, des Körpergewichts und die Kontrolle auf Proteinurie im Vordergrund. Außerdem sollten die fetale Zustandsdiagnostik (Wachstum, Doppler, CTG) und die Abschätzung der Fruchtwassermenge erfolgen.

**Ab einer Hypertonie von 150/100 mmHg soll die Schwangere in der Klinik vorgestellt werden.**

Die Einleitung einer medikamentösen Therapie ist schweren Verlaufsformen vorbehalten und sollte ausschließlich Aufgabe der Klinik sein. Zur Diagnosesicherung bzw. zum Ausschluss einer Präeklampsie können additiv die angiogenen Faktoren bestimmt werden (PIGF, sFlt-1/PIGF-Quotient) [49, 87–91].

### 6.3 Indikationen zur Vorstellung in der Klinik [11, 49, 93, 94]

- ▶ Hypertonie  $\geq 150$  mmHg systolisch bzw.  $\geq 100$  mmHg diastolisch
- ▶ manifeste Präeklampsie
- ▶ Proteinurie und starke Gewichtszunahme im III. Trimenon ( $\geq 1$  kg/Woche)
- ▶ drohende Eklampsie (Prodromalsymptome: Oberbauchschmerzen, Übelkeit, Erbrechen; zentralnervöse Symptome: Augenflimmern, persistierende Kopfschmerzen, Hyperreflexie)
- ▶ klinischer Verdacht auf HELLP-Syndrom, vor allem persistierende Oberbauchschmerzen
- ▶ Hinweise für fetale Bedrohung
  - ▶ suspektes/pathologisches CTG oder suspektes/pathologische Doppler-Sonografie
  - ▶ intrauterine Wachstumsrestriktion
- ▶ milde Hypertonie oder Proteinurie und weitere Risikofaktoren wie
  - ▶ vorbestehende maternale Erkrankungen (z. B. Diabetes mellitus)
  - ▶ Mehrlingsgravidität
  - ▶ frühes Gestationsalter ( $< 34$ . SSW)
  - ▶ An-/Oligohydramnion
  - ▶ pathologischer sFlt-1/PIGF-Quotient

### 6.4 Maßnahmen in der Klinik

#### 6.4.1 Bei Aufnahme

- ▶ maternale und fetale Zustandsdiagnostik (hypertensiver oder fetaler Notfall?):
  - ▶ schnellstmögliche Blutdruckmessung bei Aufnahme (ggf. Wiederholung nach Adaptationsphase) mit anschließender engmaschiger Blutdruckmessung bis zur Stabilisierung des Blutdrucks
  - ▶ Ausschluss Prodromalsymptome (zentrale Symptome, Oberbauchschmerz)
  - ▶ Aufnahme CTG (ab Lebensfähigkeit)
- ▶ Proteinurie-Diagnostik mittels Teststreifen bei Aufnahme und im Anschluss quantitative Eiweißbestimmung
- ▶ Labor nach Klinikstandard (vgl. ► **Tab. 4**)
- ▶ Ultraschall (Biometrie/Doppler-Sonografie)

**Tab. 5** Langzeitbehandlung mit oralen Antihypertensiva [95, 101–103]. Stand: 12/2013.

|                                                                                                                                                   | Medikament                                                        | Dosierung                               | Anmerkungen                                                                                                                             |
|---------------------------------------------------------------------------------------------------------------------------------------------------|-------------------------------------------------------------------|-----------------------------------------|-----------------------------------------------------------------------------------------------------------------------------------------|
| geeignet                                                                                                                                          | Alpha-Methyldopa                                                  | 250–500 mg oral (2–4 ×/d)<br>max. 2 g/d | Mittel der ersten Wahl                                                                                                                  |
| eingeschränkt<br>geeignet                                                                                                                         | Nifedipin retard                                                  | 20–60 mg ret. oral<br>max. 120 mg/d     | keine teratogenen Effekte nachgewiesen                                                                                                  |
|                                                                                                                                                   | selektive $\beta$ -1-Rezeptorblocker (Metoprolol Mittel der Wahl) | Dosis 25–100 mg (2 × tgl.)              | erhöhtes Risiko fetaler Wachstumsrestriktion allgemein bei $\beta$ -Blocker-Therapie                                                    |
| nicht geeignet                                                                                                                                    | Diuretika                                                         |                                         | potenzielle Beeinträchtigung der uteroplazentaren Perfusion durch zusätzliche Plasmavolumenreduktion                                    |
|                                                                                                                                                   | ACE-Hemmer                                                        |                                         | keine teratogenen Effekte nachgewiesen. Kontraindiziert im II./III. Trimenon: akutes Nierenversagen bei Neugeborenen, Oligohydramnion   |
|                                                                                                                                                   | Angiotensin AT1-Antagonisten                                      |                                         | Oligohydramnion, Schädelknochenhypoplasie, im Analogieschluss zu ACE-Hemmern potenziell teratogen und nephrotoxisch für das Neugeborene |
|                                                                                                                                                   | alle anderen Antihypertensiva                                     |                                         | ungenügende Informationen über Anwendung in der Schwangerschaft                                                                         |
| <b>Cave:</b> Dihydralazin ist wegen ausgeprägter maternaler Nebenwirkungen (Reflex tachykardie, Kopfschmerzen, Tachyphylaxie) nicht zu empfehlen. |                                                                   |                                         |                                                                                                                                         |

#### 6.4.2 Nach Stabilisierung

- ▶ Blutdrucküberwachung in Abhängigkeit von der klinischen Symptomatik
- ▶ CTG (1–3 ×/d)
- ▶ Laborkontrolle täglich bis zu 2 × pro Woche (ggf. Bestimmung angiogener Faktoren (sFlt-1/PlGF-Quotient) zur Differenzialdiagnose/Kurzzeitprognose)
- ▶ Verlaufskontrolle klinischer Symptome, insbesondere Oberbauchschmerzen, Kopfschmerzen, Sehstörungen, Hyperreflexie, (Reflexstatus prüfen), Bewusstseinsstörungen, Dyspnoe, Blutungsneigung
- ▶ Kontrolle der stündlichen Urinausscheidung bei Schwangeren mit schweren klinischen Symptomen der Präeklampsie, Puls oxymetrie bei respiratorischer Symptomatik (z. B. Dyspnoe)
- ▶ Fetometrie alle 10–14 Tage und Bestimmung der Fruchtwassermenge
- ▶ Doppler-Sonografie täglich bis wöchentlich
- ▶ RDS-Prophylaxe (24. bis 34. SSW) – individualisierte Entscheidung
- ▶ tägliche Gewichtskontrolle

## 7 Therapie

### 7.1 Grundlegende Aspekte der medikamentösen Therapie

Die **Einleitung einer medikamentösen Therapie** sollte **ausschließlich Aufgabe der Klinik** sein, da erst eine stationäre Beobachtung unter kontrollierten Bedingungen die Notwendigkeit einer medikamentösen Blutdrucksenkung ergeben kann. Diese bleibt hinsichtlich der fetalen Entwicklung weiterhin problematisch und sollte daher nicht vor anhaltenden Blutdruckwerten  $\geq 150$  mmHg systolisch und/oder  $\geq 100$  mmHg diastolisch, aber spätestens bei Blutdruckwerten von  $\geq 160/110$  mmHg begonnen werden [6, 11, 95]. Die Zielblutdruckwerte sollten  $< 150$  mmHg systolisch und  $80$ – $100$  mmHg diastolisch betragen [11]. Nach gegenwärtigem Wissensstand dient die antihypertensive Behandlung bei schwerer Hypertonie der Prävention maternaler zerebro-/kardiovaskulärer Komplikationen. Dabei steht die Vermeidung zerebraler Blutungen im Vordergrund, während zur wirksamen Eklampsie-Prophylaxe die zusätzliche Gabe von Magnesium i. v. erforderlich ist [96–100].

Ein Nutzen für die fetale Entwicklung und somit eine Verbesserung der kindlichen Prognose durch eine medikamentöse Blutdrucksenkung konnte bisher nicht nachgewiesen werden.

Patientinnen mit Kinderwunsch und chronischer Hypertonie sollten mit Medikamenten behandelt werden, die mit einer Schwangerschaft vereinbar sind [11, 20].

Bei der medikamentösen Blutdruckeinstellung chronischer Hypertonikerinnen ist in der Schwangerschaft der physiologische Blutdruckabfall in der 1. Schwangerschaftshälfte zu berücksichtigen (ggf. ist eine Dosisreduktion oder ein Absetzen der Medikation möglich).

### 7.2 Langzeitbehandlung mit oralen Antihypertensiva

Gelingt es mit Allgemeinmaßnahmen nicht, den Blutdruck  $< 150/100$  mmHg zu halten, muss eine medikamentöse antihypertensive Therapie eingeleitet oder eine vorbestehende Medikation intensiviert bzw. wieder aufgenommen werden. Bei der Wahl des Antihypertensivums sind mögliche Auswirkungen auf die fetale Entwicklung zu berücksichtigen (siehe **Tab. 5**).

### 7.3 Behandlung schwerer hypertensiver Schwangerschaftserkrankungen

#### 7.3.1 Antihypertensive Therapie

Jede initiale antihypertensive Behandlung einer schweren Hypertonie (Blutdruck  $\geq 160/110$  mmHg) muss unter einer CTG-Überwachung erfolgen, da ein ausgeprägter Blutdruckabfall mit einer akuten fetalen Gefährdung verbunden sein kann. Die Patientinnen sollten intensiv überwacht werden, wobei insbesondere engmaschige Blutdruckkontrollen (mindestens alle 10–15 min) erforderlich sind [15, 104]. Diastolische Zielblutdruckwerte von  $80$ – $100$  mmHg sollten nicht unterschritten werden [11, 97, 104].

Eine schwere hypertensive Schwangerschaftserkrankung liegt vor, wenn eine Hypertonie mit oralen Antihypertensiva nicht suffizient zu therapieren ist (s. 6.2), bzw. ein hypertensiver Notfall vorliegt. Der hypertensive Notfall (akute schwere Hypertonie über 15 min anhaltend mit vitaler Gefährdung durch Organschäden, z. B. hypertensive Enzephalopathie mit Sehstörungen, Schwindel, starke Kopfschmerzen, Bewusstseinsstörung, neurologischen Ausfallerscheinungen oder Lungenödem) erfordert eine unverzügliche medikamentöse Blutdrucksenkung [71, 104, 106, 107].

**Tab. 6** Medikamentöse Akuttherapie: Substanzen und Dosierung [1, 11, 101, 102, 104, 107].

|                           | Medikament                      |       | Dosierungsschema                                                                                      |
|---------------------------|---------------------------------|-------|-------------------------------------------------------------------------------------------------------|
| antihypertensive Therapie | Nifedipin                       | oral  | initial 5 mg oral, ggf. Wdh. nach 20 min                                                              |
|                           | Urapidil                        | i. v. | initial 6,25 mg langsam i. v. (2 min)<br>danach 3–24 mg/h (über Perfusor)                             |
|                           | Dihydralazin                    | i. v. | initial 5 mg i. v. (über 2 min)<br>danach 2–20 mg/h (über Perfusor)<br>oder<br>5 mg alle 20 min       |
|                           | bei Lungenödem/Herzinsuffizienz |       |                                                                                                       |
|                           | Furosemid                       | i. v. | 10–20 mg<br>ggf. Wdh. mit erhöhter Dosis<br>zuvor 500 ml Volumengabe                                  |
| antokonvulsive Therapie   | Magnesium                       | i. v. | initial 4–6 g (in 50 ml) in 15–20 min (als Kurzinfusion oder über Perfusor)<br>Erhaltungsdosis: 1 g/h |

Die in Deutschland erhältlichen Medikamente Nifedipin und Urapidil können ohne eindeutige Präferenz zur initialen Behandlung der schweren Hypertonie in der Schwangerschaft eingesetzt werden [103,108]. Dabei ist allerdings der Off-Label-Use von Nifedipin und Urapidil zu beachten (siehe **Tab. 6**).

Dihydralazin ist zur antihypertensiven Therapie in der Schwangerschaft zugelassen, weist aber gegenüber Urapidil signifikant häufiger maternale Nebenwirkungen (vor allem starke Kopfschmerzen, Reflextachykardie) auf, welche die differenzialdiagnostische Abgrenzung gegenüber der Progredienz einer Präeklampsie erschweren können [108,109]. Nach einer Metaanalyse ist Dihydralazin auch im Vergleich zu Nifedipin mit einer höheren Rate an maternalen Nebenwirkungen (u.a. schwere Hypotension) und perinatalen Komplikationen (u.a. vorzeitige Plazentalösung) belastet, ohne dass allerdings aus Sicht der Autoren eine abschließende Beurteilung möglich ist [110,111].

Vor der Gabe von Dihydralazin sollte zur Risikoreduzierung eines plötzlichen schweren Blutdruckabfalls mit konsekutiver fetaler Gefährdung zunächst bis zu 500 ml intravenöse Elektrolytlösung infundiert werden [11].

### 7.3.2 Antikonvulsive Therapie

Die Behandlung der ersten Wahl zur Prophylaxe einer Eklampsie besteht in der intravenösen Gabe von Magnesiumsulfat, welches bei der schweren Präeklampsie, insbesondere bei zentralnervösen Symptomen indiziert ist, da mit Magnesiumsulfat eine signifikante Reduktion der Eklampsierate zu erreichen ist [112–116]. Die Wirksamkeit dieser Anfallsprophylaxe ist bei milder Präeklampsie weniger klar, aber in Diskussion, nachdem eine großangelegte Studie, in die >10000 Schwangere mit milder wie auch mit schwerer Präeklampsie eingeschlossen wurden, eine Halbierung des Eklampsierisikos unter Magnesiumsulfat (1 g/h) gegenüber der Placebogabe gezeigt hat [99,117,118].

Bei manifester Eklampsie ist Magnesiumsulfat ebenso das Mittel der ersten Wahl [112–116]. Eine Überlegenheit gegenüber Phenytoin wie auch gegenüber Diazepam in der Prävention von Re-Konvulsionen und im Hinblick auf neonatale Ergebnisse konnte gezeigt werden [112,114,115,119]. Die intravenöse Therapie (siehe **Tab. 6**) wird mit einer Initialdosis von 4–6 g Magnesiumsulfat begonnen – appliziert in verdünnter Form über 15–20 min mittels Perfusor oder Kurzinfusion – und mit einer Erhaltungsdosis von 1 g/h fortgeführt [120].

Die Patientin muss intensiv überwacht werden: Dabei genügen im Allgemeinen die Kontrollen des Reflexstatus (Patellarsehnenreflex), der Atemfrequenz (sollte 12/min nicht unterschreiten) und der Nierenfunktion (mindestens 100 ml Ausscheidung in-

nerhalb von 4 Stunden). Kalzium sollte zur sofortigen intravenösen Injektion als Antidot bereitliegen (1 Ampulle = 10 ml Calciumgluconat 10% langsam i. v. über 3 min).

Bei Transport im Notarztwagen kann alternativ die antikonvulsive Therapie mit Diazepam oder Phenytoin durchgeführt werden.

### 7.3.3 Volumenexpansion

Eine begleitende Volumetherapie zeigt in den bislang durchgeführten randomisierten Studien keine Behandlungsvorteile [121,122]. Auf ausreichende orale Volumenzufuhr ist zu achten.

## 8 Indikationen zur Entbindung

Die Entbindung stellt bei der Präeklampsie die einzige kausale Therapie der Schwangeren dar. Eine Prolongation der Schwangerschaft dient in erster Linie der Vermeidung der Frühgeburt und setzt einen zu erwartenden Vorteil für das Kind voraus. Die Entscheidung zur Entbindung hängt somit wesentlich vom Schwangerschaftsalter ab und ist in der Regel **nach abgeschlossen 37. SSW** indiziert [11,12,72,123].

### 8.1 Präeklampsie ab der vollendeten 34. bis 37. SSW (34 + 0 bis 36 + 6 SSW)

Ab der vollendeten 34. SSW sollte jede Patientin mit schwerer Präeklampsie möglichst bald entbunden werden [8,11]. Dies gilt ebenso bei schwerer fetaler Wachstumsrestriktion < 5. Perzentile und gleichzeitig pathologischer fetaler oder fetoplazentarer Blutströmung wie einem Zero- oder Reverse Flow in der A. umbilicalis [124–132]. Von untergeordneter Bedeutung ist jedoch die Fruchtwassermenge, die bei der Präeklampsie im Gegensatz zur IUGR keinen isolierten Einfluss auf den Schwangerschaftsausgang zu haben scheint [133,134]. Bei milder Präeklampsie bzw. schwangerschaftsinduzierter Hypertonie ist eine Prolongation über die 37. SSW hinaus nicht sinnvoll [123].

Bei milden Verlaufsformen jenseits der 34. SSW (34. bis 37. SSW) sollte die erhöhte Morbidität der späten Frühgeburt abgewogen werden [135,136]. Die Mortalität „später Frühgeborener“ ist gegenüber reifen Kindern erhöht (3,5 bis 5,5-fach). Die postnatale Spätmortalität (28 Tage – 12 Monate) ist doppelt so hoch [137]. Demgegenüber steht das Risiko eines intrauterinen Fruchttods, das am Ende der Schwangerschaft (> 36 + 0 SSW) bei 3/1000 Schwangerschaften liegt. Bei schweren Präeklampsien steigt die IUFT-Rate auf 21/1000 [138]. Bei Frauen mit milder Präeklampsie ist die IUFT-Rate deutlich geringer (9/1000). Die neonatale Komplikationsrate steigt mit dem Ausmaß der fetalen Wachstumsrestriktion (besonders < 10. Perzentile). Besonders Frauen mit schwerer Präeklampsie haben gewichtsretardierte Kinder (> 12%

gegenüber gesunden Frauen). Bei milden Präeklampsien ist eine signifikante fetale Gewichtsreduktion nicht zu beobachten [139].

## 8.2 Präeklampsie ab der vollendeten 24. bis 34. SSW (24 + 0 bis 33 + 6 SSW)

Die Betreuung soll in einem **Perinatalzentrum** erfolgen. Ein **primär konservatives Vorgehen** ist empfehlenswert, da unter **kontinuierlicher Überwachung** kaum schwerwiegende Auswirkungen auf die Mutter, aber klare Vorteile für das Kind zu erwarten sind [140–142]. Ein grundsätzlich ähnliches Vorgehen erscheint beim HELLP-Syndrom vertretbar [143, 144]. Eine schwere fetale Wachstumsrestriktion < 5. Perzentile stellt allein keine klare Indikation zur Entbindung bei schwerer Präeklampsie vor 34. SSW dar, solange hochpathologische Doppler-Befunde ausbleiben [127, 132, 145].

Die Abschätzung des Risikos und des möglichen Vorteils eines abwartenden Verhaltens muss ständig neu unter Berücksichtigung aller maternalen und fetalen Veränderungen erfolgen. Neben der erheblichen Bedeutung des Schwangerschaftsalters kommt der Frage nach abgeschlossener RDS-Prophylaxe eine wichtige Rolle bei der individuellen Entscheidung zu.

Neben fetalen Indikationen bestehen folgende maternale Indikationen zur Entbindung, wobei in jedem Einzelfall der Wert des Abschlusses der RDS-Prophylaxe gegen die Dringlichkeit der Schwangerschaftsbeendigung aus maternaler Indikation abzuwägen werden sollte [6, 11, 146].

- ▶ therapierefraktäre schwere Hypertonie
- ▶ therapierefraktäre Niereninsuffizienz
- ▶ kardiale Dekompensation
- ▶ akutes Lungenödem
- ▶ disseminierte intravasale Gerinnung
- ▶ persistierende schwere Oberbauchschmerzen
- ▶ neu aufgetretene schwere zentralnervöse Symptome
- ▶ Eklampsie

## 8.3 Präeklampsie ≤ 24. SSW

Insgesamt ist mit erheblicher maternaler und perinataler Morbidität und Mortalität zu rechnen [147–149]. Die Entscheidung über die Fortsetzung der Schwangerschaft ist individuell zu treffen. Die Vermeidung mütterlicher Komplikationen steht dabei im Vordergrund.

## 8.4 Entbindungsmodus

Die Geburt kann bei stabilem maternalen und fetalen Zustand auf vaginalem Weg erfolgen, da bei optimaler Überwachung kein erhöhtes kindliches Risiko besteht [150]. In die Entscheidung zum Geburtsmodus sind der Schweregrad und die Dynamik der Erkrankung und die Erfolgsaussichten auf eine vaginale Geburtsbeendigung (z. B. zervikale Reifung) einzubeziehen [151, 152].

## 9 Betreuung im Wochenbett

**Cave:** Postpartales HELLP-Syndrom (7–30%) und postpartale Eklampsie (bis zu 28%) [68, 153].

- ▶ Fortsetzung der intensivierten Überwachung bis zu 48 Stunden postpartal
- ▶ bei schwerer Präeklampsie: Magnesiumsulfat i. v. bis zu 48 Stunden postpartal
- ▶ Blutdruckmessung post partum bis zur Blutdrucknormalisierung, Anleitung zur Blutdruckselbstmessung [154]
- ▶ Blutdruckzielwerte bei Entlassung < 150/100 mmHg
- ▶ antihypertensive Therapie ausschleichen, ggf. umstellen

## 9.1 Medikamentöse Therapie

▶ Bei einer schwangerschaftsassozierten Hypertonie ist das Ausschleichen einer medikamentösen antihypertensiven Therapie innerhalb von 3 Tagen bis 6 Wochen postpartal in den meisten Fällen möglich.

▶ Falls keine Blutdrucknormalisierung bis 6 Wochen postpartal: Diagnostik und Behandlung nach den Empfehlungen der Deutschen Hochdruckliga [155, 156].

Fortsetzung der laufenden Therapie, ggf. Umsetzen auf orale Medikation (Metoprolol, Nifedipin, Alpha-Methyl-Dopa) [103, 156].

## 9.2 Stillen

Ein Abstillen wegen einer medikamentösen, antihypertensiven Therapie ist im Allgemeinen bei der großen Auswahl stillverträglicher Antihypertensiva nicht indiziert [103].

## 9.3 Beratung

Ein Abschlussgespräch mit der Patientin über die Erkrankung, den individuellen Verlauf und weitere Konsequenzen ist unbedingt erforderlich, nach Möglichkeit im Beisein ihres Partners mit dem Angebot zur erneuten Besprechung z. B. vor Planung/Eintritt einer erneuten Schwangerschaft [157, 158]. Der Verweis auf Selbsthilfegruppen, z. B. Arbeitsgemeinschaft Gestose-Frauen e. V. ([www.gestose-frauen.de](http://www.gestose-frauen.de)), Bundesverband der Frühgeborenen e. V. (<http://www.fruehgeborene.de>), sowie European Foundation for the Care of Newborn Infants (EFCNI: [www.efcni.org](http://www.efcni.org); [www.enemenemini.eu/de/startseite](http://www.enemenemini.eu/de/startseite)) sollte erfolgen. Eine orale Kontrazeption ist im Zustand nach Präeklampsie/HELLP-Syndrom möglich [159].

## 10 Nachsorge nach Präeklampsie

### 10.1 Weitere Diagnostik nach dem Wochenbett

- ▶ Bestimmung von Serumkreatinin und Eiweißausscheidung, inkl. Mikroalbuminurie, Proteinurie idealerweise im 24-Std.-Sammelurin
- ▶ Evaluation einer evtl. Nierenschädigung 3 Monate postpartal [160–163]
- ▶ bei persistierender Proteinurie und/oder Serumkreatininerhöhung: Überweisung zum Nephrologen
- ▶ bei schwerer Präeklampsie Abklärung Antiphospholipidsyndrom/systemischer Lupus erythematoses [164]

### 10.2 Nachbetreuung der Kinder

Die Überwachung und Nachsorge orientiert sich an den allgemeinen Richtlinien. Davon betroffen sind insbesondere wachstumsverzögerte Kinder und Frühgeburten. Eine zusätzliche Untersuchung auf sensorische Integrationsstörungen sollte im 1. Lebensjahr, aber auch für zeitgerecht entwickelte Kinder oder für Kinder, die nach der 34. SSW geboren wurden, vorgesehen werden. Eine weitere zusätzliche Untersuchung im 3. Lebensjahr, vorzugsweise in einem sozial-pädiatrischen Zentrum, ist empfehlenswert.

### 10.3 Weitere Lebensführung –

#### Planung weiterer Schwangerschaften

- ▶ Patientin auf erhöhte Risiken für kardiovaskuläre Erkrankungen für Mutter und Kind hinweisen [165–183]
- ▶ Aufklärung über Wiederholungsrisiko nach Präeklampsie/HELLP-Syndrom (siehe oben) [65, 67, 184–188]



- ▶ Diagnostik und ggf. Therapie von kardiovaskulären Risikofaktoren (Nikotin, Blutfette, Diabetes, metabolisches Syndrom, Lebensstiländerung) [167, 170, 174, 176]
- ▶ Beratungsgespräch (Internist, Frauenarzt) vor geplanter Schwangerschaft (u. a. Prävention) [162, 189, 190]

## 11 Besonderheiten beim HELLP-Syndrom

### 11.1 Diagnostik

Die Diagnosestellung erfolgt laborchemisch mit Nachweis der Trias von Hämolyse, erhöhten Leberenzymen und Thrombozytopenie [191]:

**(H):** hemolysis (Hämolyse [Haptoglobin ↓])

**(EL):** elevated liver enzymes (Transaminasen ↑ [GOT, GPT])

**(LP):** low platelets (Thrombozytenzahl ↓ [< 100 G/l])

Gleichzeitig können folgende klinische Symptome auftreten [164, 192]:

- ▶ rechtsseitiger Oberbauchschmerz/epigastrischer Schmerz: > 90%
- ▶ Hypertonie: 80%
- ▶ Proteinurie: bis zu 15%
- ▶ beim HELLP-Syndrom können sowohl Proteinurie als auch Hypertonie fehlen (HELLP-Syndrom sine prae-eclampsia)
- ▶ ggf. neurologische Symptomatik

#### 11.1.1 Laborparameter

Die laborchemischen Untersuchungen sollten initial in 6–8-stündigen Intervallen wiederholt werden, vor allem dann, wenn sie zu Beginn der Erkrankung nur diskret oder aber im Hinblick auf die klassische Trias nur inkomplett verändert sind [164, 193].

Der Nachweis einer Hämolyse erfolgt am besten durch Bestimmung des Haptoglobins (bei 95–97% der Patientinnen erniedrigt, sensitivster Parameter der Hämolyse) [164, 193–199].

Weitere Hämolyseparameter [164]:

- ▶ Nachweis von Fragmentozyten im peripheren Blutaustausch (54–86%)
- ▶ Gesamtbilirubin erhöht (47–62%)

Die LDH ist kein hämolysespezifischer Parameter beim HELLP-Syndrom [164, 192, 196, 197].

Sie korreliert aber mit dem Schweregrad der Erkrankung [200].

Ein Anstieg des C-reaktiven Proteins ist beim HELLP-Syndrom in bis zu 62% der Fälle nachweisbar und nicht Folge einer Infektion [199, 201–205].

#### 11.1.2 Schmerzsymptomatik

Der rechtsseitige Oberbauchschmerz/epigastrische Schmerz kann beim HELLP-Syndrom bereits vor dem laborchemischen Nachweis eines HELLP-Syndroms auftreten. Die Schmerzen können auch retrosternal auftreten. Bei Nachweis von rechtsseitigen Oberbauchschmerzen oder auch retrosternaler Schmerzen nach der 18. SSW muss differenzialdiagnostisch ein HELLP-Syndrom ausgeschlossen bzw. nachgewiesen werden.

#### 11.1.3 Klinischer Verlauf

Fluktuierend in Schüben, mit Remissionen in bis zu 46% der Fälle oder Exazerbation innerhalb von Stunden möglich [143], insbesondere Entwicklung einer Gerinnungsstörung (DIG) häufiger als bei der Präeklampsie (keine Heparinabgaben, Hämostasekorrektur ggf. mittels Gefrierplasma) [153, 164, 193].

#### 11.1.4 Entbindungsindikationen

**Fetale Entbindungsindikationen** Die Indikationen zur Entbindung aus fetaler Sicht entsprechen den allgemeinen Entbindungsindikationen (vgl. Kap. 8) unter Einsatz der bekannten diagnostischen Methoden (Doppler-Sonografie, Biometrie, CTG, fetale Herzfrequenzvariabilität) und Berücksichtigung des Gestationsalters.

**Maternale Entbindungsindikationen** Die Indikation zur Entbindung aus maternaler Sicht richtet sich nach dem maternalen Zustand. Mit dem Ziel einer Senkung der neonatalen Morbidität und Mortalität ist ein konservatives Vorgehen – vorzugsweise in einem **Perinatalzentrum** [206] – bei einem Gestationsalter unter 34. SSW zumindest bis zur klinischen Stabilisierung zu empfehlen [19, 141, 143, 164, 206–210]. Die Indikationen zur unverzüglichen Schwangerschaftsbeendigung richten sich nach den mütterlichen und fetalen Indikationen der schweren Präeklampsie. Eine Schwangerschaftsbeendigung sollte insbesondere bei assoziierten, schwerer oder therapierefraktärer Präeklampsie, disseminierter, intravasaler Gerinnung (DIG), schwerer Niereninsuffizienz, kardialer Dekompensation oder Lungenödem erfolgen [19, 143, 164, 206, 208].

Logistische Voraussetzungen für eine Schwangerschaftsprolongation ist eine Intensivüberwachung von Mutter und Kind, die Verfügbarkeit engmaschiger Laborkontrollen, die Möglichkeit der sofortigen Schwangerschaftsbeendigung durch Sectio caesarea und die enge interdisziplinäre Kooperation mit der Neonatologie und der Anästhesie. Das therapeutische Vorgehen zur Stabilisierung der maternalen Situation richtet sich grundsätzlich nach den bei der schweren Präeklampsie beschriebenen Kriterien [193, 208, 210].

Nach der 34. SSW sollte bei nachgewiesenem HELLP-Syndrom eine Schwangerschaftsbeendigung erfolgen. Bei stabilen maternalen und fetalen Verhältnissen kann eine vaginale Entbindung angestrebt werden. Bisher liegen keine ausreichenden klinischen Erfahrungen zur Geburtseinleitung (z. B. mit Prostaglandinen) beim HELLP-Syndrom vor. Dabei ist zu berücksichtigen, dass bei Auftreten des HELLP-Syndroms oft unreife Muttermundsverhältnisse vorliegen und damit die Dauer und der Erfolg der Geburtseinleitung unkalkulierbar ist [193, 208, 210].

Grundsätzlich ist unter Beachtung aller o. g. Kriterien eine Geburtseinleitung möglich.

#### 11.1.5 Besonderheiten der Therapie

Glukokortikoide werden zunehmend im Rahmen der Prolongation der Schwangerschaft nach folgenden Therapieschemata eingesetzt [206, 211–214]:

- ▶ Methylprednisolon (Urbason®) 32 mg/d i. v. (bzw. bei Bedarf höhere Dosierung)
- ▶ Dexamethason 2–3 × 10 mg/d i. v.

**Case:** Methylprednisolon ist nur eingeschränkt plazentagängig, sodass eine zusätzliche Lungenreifetherapie (z. B. Betamethason) notwendig ist [197, 215–217].

Ante- und/oder postpartal eingesetzte Glukokortikoide führten in der Mehrzahl der Studien (wobei der Großteil der Studien Dexamethason untersuchte) zu einer klinischen und biochemischen Remission unterschiedlicher Dauer [164, 211, 213, 214, 219–232]. Eine placebokontrollierte doppelblinde Studie konnte dagegen keinen Effekt von Glukokortikoiden zeigen [233]. Nach einer Cochrane-Analyse gibt es derzeit keine suffiziente Datenlage in Bezug eines Nutzens für das fetale/maternale Outcome, sodass ein unkritischer Einsatz von Kortikosteroiden nicht zu verantworten ist [234].

#### 11.1.6 Nachsorge bei Z. n. HELLP-Syndrom

Ein HELLP-Syndrom ist keine Kontraindikation für weitere Schwangerschaften [159, 164, 189]. Eine orale Antikonzeption ist möglich. Das Wiederholungsrisiko ist gegenüber Frauen nach unkomplizierten Schwangerschaften erhöht und liegt zwischen 2 und 19% [67, 159, 164, 187, 188, 235, 236]. Das frühe HELLP-Syndrom (< 32. SSW) scheint mit einem erhöhten Risiko für ein erneutes frühes HELLP-Syndrom einherzugehen [235]. Nach einer

deutschlandweiten Studie beträgt das Risiko für HELLP-Syndrom nach HELLP-Syndrom 12,8%, das Risiko für andere hypertensive Erkrankungen in der Schwangerschaft liegt bei 30,4% [67]. In nachfolgenden Schwangerschaften ist die Gabe von niedrig-dosiertem Aspirin (100 mg/d) ab der Frühschwangerschaft indiziert. Patientinnen im Zustand nach HELLP-Syndrom sind nach den Kriterien einer Risikoschwangerschaft zu überwachen.

### Institute

- <sup>1</sup> Abteilung für Geburtsmedizin, Universitätsklinikum Leipzig, Leipzig
- <sup>2</sup> Arbeitsgemeinschaft Gestose-Frauen e.V., Issum
- <sup>3</sup> Universitätsklinikum Münster, Klinik und Poliklinik für Frauenheilkunde und Geburtshilfe, Abt. für Geburtshilfe, Münster
- <sup>4</sup> Frauenklinik für Gynäkologie und Geburtshilfe, Universitätsklinikum RWTH Aachen, Aachen
- <sup>5</sup> Frauenklinik Sozialstiftung Bamberg, Bamberg
- <sup>6</sup> Department of Pharmacology and Therapeutics, University College Cork, Cork, Ireland
- <sup>7</sup> Klinik für Geburtsmedizin, Vivantes Klinikum Neukölln, Berlin

### Literatur

- 1 *Lo JO, Mission JF, Caughey AB.* Hypertensive disease of pregnancy and maternal mortality. *Curr Opin Obstet Gynecol* 2013; 25: 124–132
- 2 *Schutte JM, Schuitemaker NW, van Roosmalen J; Dutch Maternal Mortality Committee.* Substandard care in maternal mortality due to hypertensive disease in pregnancy in the Netherlands. *BJOG* 2008; 115: 732–736
- 3 *Center for Maternal and Child Enquiries (CMACE).* Saving Mothers' Lives: reviewing maternal deaths to make motherhood safer: 2006–08. The Eighth Report on Confidential Enquiries into Maternal Deaths in the United Kingdom. *BJOG* 2011; 118 (Suppl. 1): 1–203
- 4 *Kuc S, Wortelboer EJ, van Rijn BB et al.* Evaluation of 7 serum biomarkers and uterine artery Doppler ultrasound for first-trimester prediction of preeclampsia: a systematic review. *Obstet Gynecol Surv* 2011; 66: 225–239
- 5 *Akolekar R, Syngelaki A, Poon L et al.* Competing risks model in early screening for preeclampsia by biophysical and biochemical markers. *Fetal Diagn Ther* 2013; 33: 8–15
- 6 Report of the National High Blood Pressure Education Program Working Group on High Blood Pressure in Pregnancy. *Am J Obstet Gynecol* 2000; 183: S1–S22
- 7 *Brown MA, Lindheimer MD, de Swiet M et al.* The classification and diagnosis of the hypertensive disorders of pregnancy: statement from the International Society for the Study of Hypertension in Pregnancy (ISSHP). *Hypertens Pregnancy* 2001; 20: IX–XIV
- 8 *ACOG Committee on Obstetric Practice.* ACOG practice bulletin. Diagnosis and management of preeclampsia and eclampsia. Number 33, January 2002. *Int J Gynaecol Obstet* 2002; 77: 67–75; Online: <http://mail.ny.acog.org/website/SMIPodcast/DiagnosisMgt.pdf>; Stand: 01.12.2013
- 9 *Lowe SA, Brown MA, Dekker G et al.; Society of Obstetric Medicine of Australia and New Zealand.* Guidelines for the management of hypertensive disorders of pregnancy 2008. *Aust N Z J Obstet Gynaecol* 2009; 49: 242–246
- 10 *Turner JA.* Diagnosis and management of pre-eclampsia: an update. *Int J Womens Health* 2010; 2: 327–337
- 11 *National Collaborating Centre for Women's and Children's Health – Commissioned by the National Institute for Health and Clinical Excellence; Royal College of Obstetricians and Gynaecologists.* Hypertension in pregnancy. 2011. Online: <http://www.nice.org.uk/nicemedia/live/13098/50475/50475.pdf>; Stand: 01.12.2013
- 12 *Cruz MO, Gao W, Hibbard JU.* What is the optimal time for delivery in women with gestational hypertension? *Am J Obstet Gynecol* 2012; 207: 214.e1–214.e6
- 13 *James JL, Whitley GS, Cartwright JE.* Pre-eclampsia: fitting together the placenta, immune and cardiovascular pieces. *J Pathol* 2010; 221: 363–378
- 14 *Raymond D, Peterson E.* A critical review of early-onset and late-onset preeclampsia. *Obstet Gynecol Surv* 2011; 66: 497–506
- 15 *Tranquilli AL, Brown MA, Zeeman GG et al.* The definition of severe and early-onset preeclampsia. Statements from the International Society for the Study of Hypertension in Pregnancy (ISSHP). *Pregnancy Hypertens* 2013; 3: 44–47
- 16 *Douglas KA, Redman KA.* Eclampsia in the United Kingdom. *BMJ* 1994; 309: 1395–1400
- 17 *Mattar F, Sibai BM.* Eclampsia. VIII. Risk factors for maternal morbidity. *Am J Obstet Gynecol* 2000; 182: 307–312
- 18 *Knight M.* Eclampsia in the United Kingdom 2005. *BJOG* 2007; 114: 1072–1077
- 19 *Sibai BM.* Diagnosis, controversies, and management of the syndrome of hemolysis, elevated liver enzymes, and low platelet count. *Obstet Gynecol* 2004; 103: 981–991
- 20 *Seely EW, Ecker J.* Chronic hypertension in pregnancy. *N Engl J Med* 2011; 365: 439–446
- 21 *Conde-Agudelo A, Villar J, Lindheimer M.* World Health Organisation systematic review of screening tests for preeclampsia. *Obstet Gynecol* 2004; 104: 1367–1391
- 22 *Yu CK, Smith GC, Papageorghiou AT et al.* An integrated model for the prediction of pre-eclampsia using maternal factors and uterine artery Doppler velocimetry in unselected low-risk women. *Am J Obstet Gynecol* 2005; 193: 429–436
- 23 *Papageorghiou AT, Leslie K.* Uterine artery Doppler in the prediction of adverse pregnancy outcome. *Curr Opin Obstet Gynecol* 2007; 19: 103–109
- 24 *Audibert F, Boucoiran I, An N et al.* Screening for preeclampsia using first-trimester serum markers and uterine artery Doppler in nulliparous women. *Am J Obstet Gynecol* 2010; 203: 383.e1–383.e8
- 25 *Thilaganathan B, Wormald B, Zandini C et al.* Early-pregnancy multiple serum markers and second-trimester uterine artery Doppler in predicting preeclampsia. *Obstet Gynecol* 2010; 115: 1233–1238
- 26 *Scazzocchio E, Figueras F.* Contemporary prediction of preeclampsia. *Curr Opin Obstet Gynecol* 2011; 23: 65–71
- 27 *Lachmann R, Schlembach D.* Screening, Prädiktion und Prävention der Präeklampsie. *Frauenarzt* 2013; 4: 326–331
- 28 *Akolekar R, Syngelaki A, Sarquis R et al.* Prediction of early, intermediate and late pre-eclampsia from maternal factors, biophysical and biochemical markers at 11–13 weeks. *Prenat Diagn* 2011; 31: 66–74
- 29 *Zhong Y, Tuuli M, Odibo AO.* First-trimester assessment of placenta function and the prediction of preeclampsia and intrauterine growth restriction. *Prenat Diagn* 2010; 30: 293–308
- 30 *Carbillon L.* First trimester uterine artery Doppler for the prediction of preeclampsia and foetal growth restriction. *J Matern Fetal Neonatal Med* 2012; 25: 877–883
- 31 *Kleinrouweler CE, Wiegerinck MM, Ris-Stalpers C et al.; EBM CONNECT Collaboration.* Accuracy of circulating placental growth factor, vascular endothelial growth factor, soluble fms-like tyrosine kinase 1 and soluble endoglin in the prediction of pre-eclampsia: a systematic review and meta-analysis. *BJOG* 2012; 119: 778–787
- 32 *McElrath TF, Lim KH, Pare E et al.* Longitudinal evaluation of predictive value for preeclampsia of circulating angiogenic factors through pregnancy. *Am J Obstet Gynecol* 2012; 207: 407.e1–407.e7
- 33 *Melchiorre K, Wormald B, Leslie K et al.* First-trimester uterine artery Doppler indices in term and preterm pre-eclampsia. *Ultrasound Obstet Gynecol* 2008; 32: 133–137
- 34 *Bahado-Singh RO, Jodicke C.* Uterine artery Doppler in first-trimester pregnancy screening. *Clin Obstet Gynecol* 2010; 53: 879–887
- 35 *Scazzocchio E, Figueras F, Crispi F et al.* Performance of a first-trimester screening of preeclampsia in a routine care low-risk setting. *Am J Obstet Gynecol* 2013; 208: 203.e1–203.e10
- 36 *Poon LC, Syngelaki A, Akolekar R et al.* Combined screening for preeclampsia and small for gestational age at 11–13 weeks. *Fet Diagn Ther* 2013; 13: 16–27
- 37 *Myatt L, Clifton RG, Roberts JM et al.; Eunice Kennedy Shriver National Institute of Child Health and Human Development (NICHD) Maternal-Fetal Medicine Units (MFMU) Network.* First-trimester prediction of preeclampsia in nulliparous women at low risk. *Obstet Gynecol* 2012; 119: 1234–1242
- 38 *Papageorghiou AT, Yu CK, Bindra R et al.; Fetal Medicine Foundation Second Trimester Screening Group.* Multicenter screening for pre-eclampsia and fetal growth restriction by transvaginal uterine artery Doppler at 23 weeks of gestation. *Ultrasound Obstet Gynecol* 2001; 18: 441–449
- 39 *Cnossen JS, Morris RK, ter Riet G et al.* Use of uterine artery Doppler ultrasonography to predict pre-eclampsia and intrauterine growth restriction: a systematic review and bivariable meta-analysis. *CMAJ* 2008; 178: 701–711

- 40 Yu CK, Khouri O, Onwujiwe N et al. Prediction of pre-eclampsia by uterine artery Doppler imaging: relationship to gestational age at delivery and small-for-gestational age. *Ultrasound Obstet Gynecol* 2008; 31: 310–313
- 41 Phupong V, Dejthavorn T. Predicting risks of preeclampsia and small for gestational age infant by uterine artery Doppler. *Hypertens Pregnancy* 2008; 27: 387–395
- 42 Cooper S, Johnson JA, Metcalfe A et al. The predictive value of 18–22 week uterine artery Doppler in patients with low first trimester maternal serum PAPP-A. *Prenat Diagn* 2009; 29: 248–252
- 43 Stepan H, Unversucht A, Wessel N et al. Predictive value of maternal angiogenic factors in second trimester pregnancies with abnormal uterine perfusion. *Hypertension* 2007; 49: 818–824
- 44 Spencer K, Yu CK, Savvidou M et al. Prediction of pre-eclampsia by uterine artery Doppler ultrasonography and maternal serum pregnancy-associated plasma protein-A, free beta-human chorionic gonadotropin, activin A and inhibin A at 22 + 0 to 24 + 6 weeks' gestation. *Ultrasound Obstet Gynecol* 2006; 27: 658–663
- 45 Gómez-Arriaga PI, Herraiz I, López-Jiménez EA et al. Uterine artery Doppler and sFlt-1/PIGF ratio: usefulness in diagnosis of pre-eclampsia. *Ultrasound Obstet Gynecol* 2013; 41: 530–537
- 46 Levine RJ, Lam C, Quian C et al.; for the CPEP Study Group. Soluble endoglin and other circulating antiangiogenic factors in preeclampsia. *New Engl J Med* 2006; 355: 992–1005
- 47 Crispi F, Domínguez C, Llurba E et al. Placental angiogenic growth factors and uterine artery Doppler findings for characterization of different subsets in preeclampsia and isolated intrauterine growth restriction. *Am J Obstet Gynecol* 2006; 195: 201–207
- 48 Crispi F, Llurba E, Domínguez C et al. Predictive value of angiogenic factors and uterine artery Doppler for early- versus late-onset pre-eclampsia and intrauterine growth restriction. *Ultrasound Obstet Gynecol* 2008; 31: 303–309
- 49 Verlohren S, Galindo A, Schlembach D et al. An automated method for the determination of the sFlt-1/PIGF ratio in the assessment of preeclampsia. *Am J Obstet Gynecol* 2010; 202: 161.e1–161.e11
- 50 Verlohren S, Herraiz I, Lapaire O et al. The sFlt-1/PIGF ratio in different types of hypertensive pregnancy disorders and its prognostic potential in preeclamptic patients. *Am J Obstet Gynecol* 2012; 206: 58.e1–58.e8
- 51 Bujold E, Roberge S, Lacasse Y et al. Prevention of preeclampsia and intrauterine growth restriction with aspirin started in early pregnancy: a meta-analysis. *Obstet Gynecol* 2010; 116 (2 Pt 1): 402–414
- 52 Roberge S, Villa P, Nicolaidis K et al. Early administration of low-dose aspirin for the prevention of preterm and term preeclampsia: a systematic review and meta-analysis. *Fetal Diagn Ther* 2012; 31: 141–146
- 53 Bujold E, Morency AM, Roberge S et al. Acetylsalicylic acid for the prevention of preeclampsia and intra-uterine growth restriction in women with abnormal uterine artery Doppler: a systematic review and meta-analysis. *J Obstet Gynecol Can* 2009; 31: 818–826
- 54 Murakami S, Saitoh M, Kubo T et al. Renal disease in women with severe preeclampsia or gestational proteinuria. *Obstet Gynecol* 2000; 96: 945–949
- 55 Stamilio DM, Sehdev HM, Morgan MA et al. Can antenatal clinical and biochemical markers predict the development of severe preeclampsia? *Am J Obstet Gynecol* 2000; 182: 589–594
- 56 Dekker G, Sibai B. Primary, and tertiary prevention of preeclampsia. *Lancet* 2001; 357: 209–215
- 57 Julkunen H. Pregnancy and lupus nephritis. *Scand J Urol Nephrol* 2001; 35: 319–327
- 58 Erkan D, Sammaritano L. New insights into pregnancy-related complications in systemic lupus erythematosus. *Curr Rheumatol Rev* 2003; 5: 357–363
- 59 Duckitt K, Harrington D. Risk factors for pre-eclampsia at antenatal booking: systematic review of controlled studies. *BMJ* 2005; 330: 565
- 60 Chappell LC, Enye S, Seed P et al. Adverse perinatal outcomes and risk factors for preeclampsia in women with chronic hypertension: a prospective study. *Hypertension* 2008; 51: 1002–1009
- 61 Trostad L, Magnus P, Stoltenberg C. Pre-eclampsia: risk factors and causal models. *Best Pract Res Clin Obstet Gynaecol* 2011; 25: 329–342
- 62 Pecks U, Maass N, Neulen J. Oocyte donation: a risk factor for pregnancy-induced hypertension: a meta-analysis and case series. *Dtsch Arztebl Int* 2011; 108: 23–31
- 63 Barton JR, Sibai BM. Prediction and prevention of recurrent preeclampsia. *Am J Obstet Gynecol* 2008; 112 (2 Pt 1): 359–372
- 64 Brown MA, Mackenzie C, Dunsmuir W et al. Can we predict recurrence of pre-eclampsia or gestational hypertension? *BJOG* 2007; 114: 984–993
- 65 Mostello D, Kallogerji D, Tungsiripat R et al. Recurrence of preeclampsia: effects of gestational age at delivery of the first pregnancy, body mass index, paternity, and interval between births. *Am J Obstet Gynecol* 2008; 199: 55.e1–55.e7
- 66 Hernández-Díaz S, Toh S, Cnattingius S. Risk of pre-eclampsia in first and subsequent pregnancies: prospective cohort study. *BMJ* 2009; 338: b2255
- 67 Leeners B, Neumaier-Wagner PM, Kuse S et al. Recurrence risk of hypertensive disease in pregnancy after HELLP syndrome. *J Perinat Med* 2011; 39: 673–678
- 68 Sibai BM. Diagnosis, prevention, and management of eclampsia. *Obstet Gynecol* 2005; 105: 402–410
- 69 Shennan A, Gupta M, Halligan A et al. Lack of reproducibility in pregnancy of Korotkoff phase IV as measured by mercury sphygmomanometry. *Lancet* 1996; 347: 139–142
- 70 Brown MA, Buddle ML, Farrell T et al. Randomised trial of management of hypertensive pregnancies by Korotkoff phase IV or phase V. *Lancet* 1998; 352: 777–781
- 71 Bergert FW, Braun M, Clarius H et al. Hausärztliche Leitlinie Hypertonie – Therapie der Hypertonie. 2010. Online: [http://www.pmvforschungsguppe.de/pdf/03\\_publicationen/hypertonie\\_1l.pdf](http://www.pmvforschungsguppe.de/pdf/03_publicationen/hypertonie_1l.pdf); Stand: 01.12.2013
- 72 Pettit F, Brown MA. The management of pre-eclampsia: what we think we know. *Eur J Obstet Gynecol Reprod Biol* 2012; 160: 6–12
- 73 Brown MA, Mangos G, Davis G et al. The natural history of white coat hypertension during pregnancy. *BJOG* 2005; 112: 601–606
- 74 Villar J, Say L, Shennan A et al. Methodological and technical issues related to the diagnosis, screening, prevention, and treatment of pre-eclampsia and a eclampsia. *Int J Gynaecol Obstet* 2004; 85 (Suppl. 1): S28–S41
- 75 Chung Y, de Greeff A, Shennan A. Validation and compliance of a home monitoring device in pregnancy: microlife WatchBP home. *Hypertens Pregnancy* 2009; 28: 348–359
- 76 Waugh JJ, Bell SC, Kilby MD et al. Optimal bedside urinalysis for the detection of proteinuria in hypertensive pregnancy: a study of diagnostic accuracy. *BJOG* 2005; 112: 412–417
- 77 Gangaram R, Ojwang PJ, Moodley J et al. The accuracy of uterine dipsticks as a screening test for proteinuria in hypertensive disorders of pregnancy. *Hypertens Pregnancy* 2005; 24: 117–123
- 78 Lindheimer MD, Kanter D. Interpreting abnormal proteinuria in pregnancy. *Obstet Gynecol* 2010; 115: 365–375
- 79 Airolidi K, Weinstein L. Clinical significance of proteinuria in pregnancy. *Obstet Gynecol Surv* 2007; 62: 117–124
- 80 Côté AM, Brown MA, Lam E et al. Diagnostic accuracy of urinary spot protein:creatinine ratio for proteinuria in hypertensive pregnant women: systematic review. *BMJ* 2008; 336: 1003–1006
- 81 Yamasmith W, Chaithongwongwatthana S, Charoenvidhya D et al. Random urinary protein-to-creatinine ratio for prediction of significant proteinuria in women with preeclampsia. *J Matern Fetal Neonatal Med* 2004; 16: 275–279
- 82 Wiwanikit V. Periodic urinary protein creatinine ratio for predicting significant proteinuria in preeclampsia in different alternatives: time effectiveness analysis. *Arch Gynecol Obstet* 2010; 281: 571–573
- 83 Morris RK, Riley RD, Doug M et al. Diagnostic accuracy of spot urinary protein and albumin to creatinine ratios for detection of significant proteinuria or adverse pregnancy outcome in patients with suspected pre-eclampsia: systematic review and meta-analysis. *BMJ* 2012; 345: e4342
- 84 Chen BA, Parviainen K, Jeyabalan A. Correlation of catheterized and clean catch urine protein/creatinine ratios in preeclampsia evaluation. *Obstet Gynecol* 2008; 112: 606–610
- 85 Phelan LK, Brown MA, Davis GK et al. A prospective study of the impact of automated dipstick urinalysis on the diagnosis of preeclampsia. *Hypertens Pregnancy* 2004; 23: 135–142
- 86 Ochsenein-Köblle N, Roos M, Gasser T et al. Cross-sectional study of weight gain and increase in BMI throughout pregnancy. *Eur J Obstet Gynaecol Reprod Biol* 2007; 130: 180–186
- 87 Thangaratinam S, Koopmans CM, Iyengar S et al.; TIPPS (Test in Prediction of Preeclampsia's Severity) Review Group. Accuracy of liver function test for predicting adverse maternal and fetal outcomes in women with preeclampsia: a systematic review. *Acta Obstet Gynecol Scand* 2011; 90: 574–585



- 88 Ghosh SK, Raheja S, Tull A et al. Serum PlGF as a potential biomarker for predicting the onset of preeclampsia. *Arch Gynecol Obstet* 2012; 285: 417–422
- 89 Hawkins TL, Roberts JM, Mangos GJ et al. Plasma uric acid remains a marker of poor outcome in hypertensive pregnancy: a retrospective cohort study. *BJOG* 2012; 119: 484–492
- 90 Sibiude J, Guibourdenche J, Dionne MD et al. Placental growth factor for the prediction of adverse outcomes in patients with suspected preeclampsia or intrauterine growth restriction. *PLoS One* 2012; 7: e50208
- 91 Rana S, Powe CE, Salahuddin S et al. Angiogenic factors and the risk of adverse outcomes in women with suspected preeclampsia. *Circulation* 2012; 125: 911–919
- 92 Milne F, Redman C, Walker J et al. The pre-eclampsia community guideline (PRECOG): how to screen for and detect onset of pre-eclampsia in the community. *BMJ* 2005; 330: 576–580
- 93 Rath W. Hypertensive Schwangerschaftserkrankungen. *Der Gynäkologe* 1999; 32: 432–442
- 94 Thangaratinam S, Gallos ID, Meah N et al.; TIPPS (Tests in Prediction of Pre-eclampsia's Severity) Review Group. *Acta Obstet Gynecol Scand* 2011; 90: 564–573
- 95 Abalos E, Duley L, Steyn DW et al. Antihypertensive drug therapy for mild to moderate hypertension during pregnancy. *Cochrane Database Syst Rev* 2007; 1: CD002252
- 96 Redman CW, Roberts JM. Management of pre-eclampsia. *Lancet* 1993; 341: 1451–1454
- 97 Sibai BM. Treatment of hypertension in pregnant women. *N Engl J Med* 1996; 335: 257–265
- 98 Coetzee EJ, Domisse J, Anthony J. A randomised controlled trial of intravenous magnesium sulphate versus placebo in the management of women with severe pre-eclampsia. *Br J Obstet Gynaecol* 1998; 105: 300–303
- 99 Altman D, Carroli D, Duley L et al.; Magpie Trial Collaboration Group. Do women with pre-eclampsia, and their babies, benefit from magnesium sulphate? The Magpie Trial: a randomised placebo-controlled trial. *Lancet* 2002; 359: 1877–1890
- 100 Sibai B, Dekker G, Kupferminc M. Pre-eclampsia. *Lancet* 2005; 365: 785–799
- 101 Steegers EA, van Dadelszen P, Duvekot JJ et al. Pre-eclampsia. *Lancet* 2010; 376: 631–644
- 102 Magee LA, Abalos E, van Dadelszen P et al.; CHIPS Study Group. How to manage hypertension in pregnancy effectively. *Br J Clin Pharmacol* 2011; 72: 394–401
- 103 Schaefer C, Spielmann H, Vetter K. Arzneimittel in Schwangerschaft und Stillzeit. 8. Aufl. München: Verlag Urban & Fischer; 2012
- 104 Committee on Obstetric Practice. Committee Opinion no. 514: emergent therapy for acute-onset, severe hypertension with preeclampsia or eclampsia. *Obstet Gynecol* 2011; 118: 1465–1468
- 105 Leveno KJ, Cunningham FG. Management of Preeclampsia. In: Lindheimer MD, Roberts JM, Cunningham FG, eds. *Chesley's hypertensive Disorders in Pregnancy*. Stamford, Connecticut: Appleton & Lange; 1999: 543–580
- 106 Behandlung der hypertensiven Krise. *Arznei-Telegramm* 1999; 1: 2–5
- 107 Van den Born BJ, Beutler JJ, Gaillard CA et al. Dutch guideline for the management of hypertensive crisis – 2010 revision. *Neth J Med* 2011; 69: 248–255
- 108 Wacker JR, Wagner BK, Briese V et al. Antihypertensive therapy in patients with preeclampsia: a prospective randomised multicentre study comparing dihydralazine with urapidil. *Eur J Obstet Gynecol Reprod Med* 2006; 127: 160–165
- 109 Carles G, Helou J, Dallah F et al. Use of injectable urapidil in pregnancy-induced hypertension and preeclampsia. *J Gynecol Obstet Biol Reprod* 2012; 41: 645–649
- 110 Magee LA, Cham C, Waterman EJ et al. Hydralazine for treatment of severe hypertension in pregnancy: meta-analysis. *BMJ* 2003; 327: 955–960
- 111 Duley L, Henderson-Smart DJ, Meher S. Drugs for treatment of very high blood pressure during pregnancy. *Cochrane Database Syst Rev* 2006; 3: CD001449
- 112 Duley L, Henderson-Smart DJ, Walker GJ et al. Magnesium sulphate versus diazepam for eclampsia. *Cochrane Database Syst Rev* 2010; 12: CD000127
- 113 Duley L, Gülmezoglu AM, Henderson-Smart DJ et al. Magnesium sulphate and other anticonvulsants for women with pre-eclampsia. *Cochrane Database Syst Rev* 2010; 11: CD000025
- 114 Duley L, Henderson-Smart DJ, Chou D. Magnesium sulphate versus phenytoin for eclampsia. *Cochrane Database Syst Rev* 2010; 10: CD000128
- 115 Duley L, Gülmezoglu AM, Chou D. Magnesium sulphate versus lytic cocktail for eclampsia. *Cochrane Database Syst Rev* 2010; 9: CD002960
- 116 Duley L. Pre-eclampsia, eclampsia, and hypertension. *BMJ Clin Evid* 2011; 2011: pii: 1402
- 117 Magpie Trial Follow-Up Study Collaborative Group. The Magpie Trial: a randomised trial comparing magnesium sulphate with placebo for pre-eclampsia. Outcome for women at 2 years. *BJOG* 2007; 114: 300–309
- 118 Magpie Trial Follow-Up Study Collaborative Group. The Magpie Trial: a randomised trial comparing magnesium sulphate with placebo for pre-eclampsia. Outcome for children at 18 months. *BJOG* 2007; 114: 289–299
- 119 Which anticonvulsant for women with eclampsia? Evidence from the Collaborative Eclampsia Trial. *Lancet* 1995; 345: 1455–1463
- 120 Duley L, Matar HE, Almerie MQ et al. Alternative magnesium sulphate regimens for women with pre-eclampsia and eclampsia. *Cochrane Database Syst Rev* 2010; 8: CD007388
- 121 Duley L, Williams J, Henderson-Smart DJ. Plasma volume expansion for treatment of women with pre-eclampsia. *Cochrane Database Syst Rev* 2000; 2: CD001805
- 122 Ganzevoort W, Rep A, Bonsel GJ et al.; PETRA investigators. A randomised controlled trial comparing two temporising management strategies, one with and one without plasma volume expansion, for severe and early onset pre-eclampsia. *BJOG* 2005; 112: 1358–1368
- 123 Koopmans CM, Bijlenga D, Groen H et al.; HYPITAT study group. Induction of labour versus expectant monitoring for gestational hypertension or mild pre-eclampsia after 36 weeks' gestation (HYPITAT): a multicentre, open-label randomised controlled trial. *Lancet* 2009; 374: 979–988
- 124 Alfievic Z, Neilson JP. Doppler ultrasonography in high-risk pregnancies: systematic review with meta-analysis. *Am J Obstet Gynecol* 1995; 172: 1379–1387
- 125 Westergaard HB, Langhoff-Roos J, Lingman G et al. A critical appraisal of the use of umbilical artery Doppler ultrasound in high-risk pregnancies: use of meta-analyses in evidence-based obstetrics. *Ultrasound Obstet Gynecol* 2001; 17: 466–476
- 126 Baschat AA. Pathophysiology of fetal growth restriction: implications for diagnosis and surveillance. *Obstet Gynecol Surv* 2004; 59: 617–627
- 127 Marsal K. Obstetric management of intrauterine growth restriction. *Best Pract Res Clin Obstet Gynaecol* 2009; 23: 857–870
- 128 Alfievic Z, Stampalija T, Gyte GM. Fetal and umbilical Doppler ultrasound in high risk pregnancies. *Cochrane Database Syst Rev* 2010; 1: CD007529
- 129 Maulik D, Mundy D, Heitmann E et al. Evidence-based approach to umbilical artery Doppler fetal surveillance in high-risk pregnancies: an update. *Clin Obstet Gynecol* 2010; 53: 869–878
- 130 Galan HL. Timing delivery of the growth restricted fetus. *Semin Perinatol* 2011; 35: 262–269
- 131 Morris RK, Malin G, Robson SC et al. Fetal umbilical artery Doppler to predict compromise of fetal/neonatal wellbeing in a high-risk population: systematic review and bivariate meta-analysis. *Ultrasound Obstet Gynecol* 2011; 37: 135–142
- 132 Schlembach D. Intrauterine Wachstumsrestriktion – Diagnostik und Management. *Geburtsh Frauenheilk* 2012; 72: 373–375
- 133 Magann EF, Chauhan SP, Kinsella MJ et al. Antenatal testing among 1001 patients at high risk: the role of ultrasonographic estimate of amniotic fluid volume. *Am J Obstet Gynecol* 1999; 180: 1330–1336
- 134 Hashimoto K, Kasdaglis T, Jain S et al. Isolated low-normal amniotic fluid volume in the early third-trimester: association with adverse perinatal outcomes. *J Perinat Med* 2013; 41: 349–353
- 135 Backes CH, Marham K, Moorehead P et al. Maternal preeclampsia and neonatal outcomes. *J Pregnancy* 2011; 2011: 2141365
- 136 Reddy UM, Bettegowda VR, Dias T et al. Term pregnancy: a period of heterogeneous risk for infant mortality. *Obstet Gynecol* 2011; 117: 1279–1287
- 137 Khashu M, Narayanan M, Bhargava S et al. Perinatal outcomes associated with preterm birth at 33 to 36 week's gestation: a population-based cohort study. *Pediatrics* 2009; 123: 109–113
- 138 Simpson LL. Maternal medical disease: risk of antepartum fetal death. *Semin Perinatol* 2002; 26: 42–50



- 139 Odegård RA, Vatten LJ, Nilsson ST *et al.* Preeclampsia and fetal growth. *Obstet Gynecol* 2000; 96: 950–955
- 140 Odendaal HJ, Pattinson RC, Bam R *et al.* Aggressive or expectant management for patients with severe preeclampsia between 28–34 weeks' gestation: a randomized controlled trial. *Obstet Gynecol* 1990; 76: 1070–1075
- 141 Sibai BM, Mercer BM, Schiff E *et al.* Aggressive versus expectant management of severe pre-eclampsia at 28 to 32 weeks' gestation: a randomized controlled trial. *Am J Obstet Gynecol* 1994; 171: 818–822
- 142 Haddad B, Deis S, Goffinet F *et al.* Maternal and perinatal outcomes during expectant management of 239 severe preeclamptic women between 24 and 33 weeks' gestation. *Am J Obstet Gynecol* 2004; 190: 1590–1597
- 143 Visser W, Wallenburg HC. Temporising management of severe pre-eclampsia with and without the HELLP syndrome. *Br J Obstet Gynaecol* 1995; 102: 111–117
- 144 Abramovici D, Friedman SA, Mercer BM *et al.* Neonatal outcome in severe preeclampsia at 24 to 36 weeks' gestation: does the HELLP (hemolysis, elevated liver enzymes, and low platelet count) syndrome matter? *Am J Obstet Gynecol* 1999; 180: 221–225
- 145 Shear RM, Rinfret D, Leduc L. Should we offer expectant management in cases of severe preterm preeclampsia with fetal growth restriction? *Am J Obstet Gynecol* 2005; 192: 1119–1125
- 146 Sibai BM; Publications Committee; Society for Maternal-Fetal Medicine. Evaluation and management of severe preeclampsia before 34 weeks' gestation. *Am J Obstet Gynecol* 2011; 205: 191–198
- 147 Sibai BM, Akl S, Fairlie F *et al.* A protocol for managing severe preeclampsia in the second trimester. *Am J Obstet Gynecol* 1990; 163: 733–738
- 148 Gaugler-Senden IP, Huijssoon AG, Visser W *et al.* Maternal and perinatal outcome of preeclampsia with an onset before 24 weeks' gestation. Audit in a tertiary referral center. *Eur J Obstet Gynecol Reprod Biol* 2006; 128: 216–221
- 149 Bombrys AE, Barton JR, Nowacki EA *et al.* Expectant management of severe preeclampsia at less than 27 weeks' gestation: maternal and perinatal outcomes according to gestational age by weeks at onset of expectant management. *Am J Obstet Gynecol* 2008; 199: 247.e1–247.e6
- 150 Nassar AH, Adra AM, Chakhtoura N *et al.* Severe preeclampsia remote from term: labor induction or elective cesarean delivery? *Am J Obstet Gynecol* 1998; 179: 1210–1213
- 151 Rath W. Hypertensive Schwangerschaftserkrankungen. In: Rath W, Friese K, Hrsg. *Erkrankungen in der Schwangerschaft*. Stuttgart, New York: Thieme; 2005: 73–97
- 152 Seal SL, Gosh D, Kamilya G *et al.* Does route of delivery affect maternal and perinatal outcome in women with eclampsia? A randomized controlled pilot study. *Am J Obstet Gynecol* 2012; 206: 484.e1–484.e7
- 153 Sibai BM, Ramadan MK, Usta I *et al.* Maternal morbidity and mortality in 442 pregnancies with hemolysis, elevated liver enzymes, and low platelets (HELLP syndrome). *Am J Obstet Gynecol* 1993; 169: 1000–1006
- 154 Sanner B. Richtig Blutdruck messen. *Druckpunkt* 2008; 3: 14–17. Online: <http://www.hochdruckliga.de/richtig-blutdruck-messen.html>; Stand: 01.12.2013
- 155 Haller H. Leitlinien zur Diagnostik und Therapie der arteriellen Hypertonie. *Druckpunkt* 2007; 3: 16–18; <http://www.hochdruckliga.de/leitlinien-zur-diagnostik-und-therapie-der-arteriellen-hypertonie.html>; Stand: 01.12.2013
- 156 AWMF-Leitlinie 046/001: Leitlinien zur Behandlung der arteriellen Hypertonie. Online: [http://www.awmf.org/uploads/tx\\_szleitlinien/046-001\\_S2\\_Behandlung\\_der\\_arteriellen\\_Hypertonie\\_06-2008\\_06-2013.pdf](http://www.awmf.org/uploads/tx_szleitlinien/046-001_S2_Behandlung_der_arteriellen_Hypertonie_06-2008_06-2013.pdf); Stand: 01.12.2013
- 157 Leeners B, Rath W, Kuse S *et al.* Satisfaction with medical information in women with hypertensive disorders in pregnancy. *J Psychosom Res* 2006; 60: 39–44
- 158 Leeners B, Neumaier-Wagner P, Kuse S *et al.* Emotional stress and the risk to develop hypertensive diseases in pregnancy. *Hypertens Pregnancy* 2007; 26: 211–226
- 159 Sibai BM, Ramadan MK, Chari RS *et al.* Pregnancies complicated by HELLP syndrome (hemolysis, elevated liver enzymes, and low platelets): subsequent pregnancy outcome and long-term prognosis. *Am J Obstet Gynecol* 1995; 172 (1 Pt 1): 125–129
- 160 Nagai Y, Arai H, Washizawa Y *et al.* FSGS-like lesions in pre-eclampsia. *Clin Nephrol* 1991; 36: 134–140
- 161 Nisell H, Lintu H, Lunell NO *et al.* Blood pressure and renal function seven years after pregnancy complicated by hypertension. *Br J Obstet Gynaecol* 1995; 102: 876–881
- 162 Pourrat O, Pierre F. [Medical assessment after a pre-eclampsia: why? for whom? when? how? for what purpose?]. *Rev Med Interne* 2010; 31: 766–771
- 163 Spaan JJ, Ekhardt T, Spaanderman ME *et al.* Renal function after preeclampsia: a longitudinal pilot study. *Nephron Clin Pract* 2012; 120: c156–c161
- 164 Haram K, Svendsen E, Abildgaard U. The HELLP syndrome: clinical issues and management. A Review. *BMC Pregnancy Childbirth* 2009; 9: 8
- 165 Sibai BM, el-Nazer A, Gonzalez-Ruiz A. Severe preeclampsia-eclampsia in young primigravid women: subsequent pregnancy outcome and remote prognosis. *Am J Obstet Gynecol* 1986; 155: 1011–1016
- 166 Van Assche FA, Holemans K, Aerts L. Fetal growth and consequences for later life. *J Perinat Med* 1998; 26: 337–346
- 167 Irgens HU, Reisaeter L, Irgens LM *et al.* Long term mortality of mothers and fathers after pre-eclampsia: population based cohort study. *BMJ* 2001; 323: 1213–1217
- 168 Sattar N, Greer IA. Pregnancy complications and maternal cardiovascular risk: opportunities for intervention and prevention. *BMJ* 2002; 325: 157–160
- 169 Wilson BJ, Watson MS, Prescott GJ *et al.* Hypertensive diseases of pregnancy and risk of hypertension and stroke in later life: results from cohort study. *BMJ* 2003; 326: 845–851
- 170 Roberts JM, Gammill H. Pre-eclampsia and cardiovascular disease in later life. *Lancet* 2005; 366: 961–962
- 171 Anderson CM. Preeclampsia: exposing future cardiovascular risk in mothers and their children. *J Obstet Gynecol Neonatal Nurs* 2007; 36: 3–8
- 172 Newstead J, von Dadelszen P, Magee LA. Preeclampsia and future cardiovascular risk. *Expert Rev Cardiovasc Ther* 2007; 5: 283–294
- 173 Suzuki H, Watanabe Y, Arima H *et al.* Short- and long-term prognosis of blood pressure and kidney disease in women with a past history of preeclampsia. *Clin Exp Nephrol* 2008; 12: 102–109
- 174 Lykke JA, Langhoff-Roos J, Sibai BM *et al.* Hypertensive pregnancy disorders and subsequent cardiovascular morbidity and type 2 diabetes mellitus in the mother. *Hypertension* 2009; 53: 944–951
- 175 Iversen L, Hannaford PC. Toxaemia of pregnancy and risk of mortality in later life: evidence from the Royal College of General Practitioners' Oral Contraception Study. *Hypertens Pregnancy* 2010; 29: 180–197
- 176 Lykke JA, Langhoff-Roos J, Lockwood CJ *et al.* Mortality of mothers from cardiovascular and non-cardiovascular causes following pregnancy complications in first delivery. *Pediatr Perinat Epidemiol* 2010; 24: 323–330
- 177 Díaz-Martínez LA, D'Ávila Pedraza Ndel M, Serrano Díaz NC *et al.* [The prognosis for children of mothers with preeclampsia. Part 2: long-term effects]. *Arch Argent Pediatr* 2011; 109: 519–524
- 178 Davis EF, Lazdam M, Lewandowski AJ *et al.* Cardiovascular risk factors in children and young adults born to preeclamptic pregnancies: a systematic review. *Pediatrics* 2012; 129: e1552–e1561
- 179 Mangos GJ, Spaan JJ, Pirabhabhar S *et al.* Markers of cardiovascular disease after hypertension in pregnancy. *J Hypertens* 2012; 30: 351–358
- 180 Smith GN, Pudwell J, Walker M *et al.* Ten-year, thirty-year, and lifetime cardiovascular disease risk estimates following a pregnancy complicated by preeclampsia. *J Obstet Gynaecol Can* 2012; 34: 830–835
- 181 Brown MC, Best KE, Pearce MS *et al.* Cardiovascular disease risk in women with pre-eclampsia: systematic review and meta-analysis. *Eur J Epidemiol* 2013; 28: 1–19
- 182 Brown MC, Bell R, Collins C *et al.* Women's perception of future risk following pregnancies complicated by preeclampsia. *Hypertens Pregnancy* 2013; 32: 60–73
- 183 Heidrich MB, Wenzel D, von Kaisenberg CS *et al.* Preeclampsia and long-term risk of cardiovascular disease: what do obstetrician-gynecologists know? *BMC Pregnancy Childbirth* 2013; 13: 61
- 184 Sibai BM, Mercer B, Sarinoglu C. Severe preeclampsia in the second trimester: recurrence risk and long-term prognosis. *Am J Obstet Gynecol* 1991; 165 (5 Pt 1): 1408–1412
- 185 Dukler D, Porath A, Bashiri A *et al.* Remote prognosis of primiparous women with preeclampsia. *Eur J Obstet Gynecol Reprod Biol* 2001; 96: 69–74
- 186 Van Rijn BB, Hoeks LB, Bots ML *et al.* Outcomes of subsequent pregnancy after first pregnancy with early-onset preeclampsia. *Am J Obstet Gynecol* 2006; 195: 723–728

- 187 Langenveld J, Jansen S, van der Post J et al. Recurrence risk of a delivery before 34 weeks of pregnancy due to an early onset hypertensive disorder: a systematic review. *Am J Perinatol* 2010; 27: 565–571
- 188 Langenveld J, Buttinger A, van der Post J et al. Recurrence risk and prediction of a delivery under 34 weeks of gestation after a history of a severe hypertensive disorder. *BJOG* 2011; 118: 589–595
- 189 Fischer T, Langenfeld M. Nachbetreuung von Präeklampsie-Patientinnen. In: Heilmann L, Rath W, Hrsg. Schwangerschaftshochdruck. Stuttgart: Wissenschaftliche Verlagsgesellschaft; 2002: 279–296
- 190 Fischer T, Pildner von Steinburg S, Diedrich F et al. Prävention der Präeklampsie. *Zentralbl Gynakol* 2005; 127: 83–90
- 191 Weinstein L. Syndrome of hemolysis, elevated liver enzymes, and low platelet count: a severe consequence of hypertension in pregnancy. *Am J Obstet Gynaecol* 1982; 142: 159–167
- 192 Rath W, Loos W, Graeff H et al. Das HELLP-Syndrom. *Der Gynäkologe* 1992; 25: 430–440
- 193 Rath W, Faridi A, Dudenhausen JW. HELLP syndrome. *J Perinat Med* 2000; 28: 249–260
- 194 Marchand A, Galen RS, Van LF. The predictive value of serum haptoglobin in hemolytic disease. *JAMA* 1980; 243: 1909–1911
- 195 Poldre PA. Haptoglobin helps diagnose the HELLP syndrome. *Am J Obstet Gynecol* 1987; 157: 1267
- 196 Wilke G, Rath W, Schutz E et al. Haptoglobin as a sensitive marker of hemolysis in HELLP syndrome. *Int J Gynecol Obstet* 1992; 39: 29–34
- 197 Van Runnard Heimel PJ, Franx A, Schobben AF et al. Corticosteroids, pregnancy, and HELLP syndrome: a review. *Obstet Gynecol Surv* 2005; 60: 57–70
- 198 Deruelle P, Coudoux E, Ego A et al. Risk factors for post-partum complications occurring after preeclampsia and HELLP syndrome. A study in 453 consecutive pregnancies. *Eur J Obstet Gynecol Reprod Biol* 2006; 125: 59–65
- 199 Van Runnard Heimel PJ, Kavelaars A, Heijnen CJ et al. HELLP syndrome is associated with an increased inflammatory response, which may be inhibited by administration of prednisolone. *Hypertens Pregnancy* 2008; 27: 253–265
- 200 Martin JN jr., May WL, Magann EF et al. Early risk assessment of severe preeclampsia: admission battery of symptoms and laboratory tests to predict likelihood of subsequent significant maternal morbidity. *Am J Obstet Gynecol* 1999; 180: 1407–1414
- 201 Hackenberg H, Rappe N, Wohlers S et al. Wertigkeit des C-reaktiven Proteins (CRP) beim HELLP-Syndrom. *Geburtsh Frauenheilk* 1998; 58: 508–512
- 202 Paternoster DM, Fantinato S, Stella A et al. C-reactive protein in hypertensive disorders in pregnancy. *Clin Appl Thromb Hemost* 2006; 12: 330–337
- 203 Molvarec A, Prohászka Z, Nagy B et al. Association of increased serum heat shock protein 70 and C-reactive protein concentrations and decreased serum alpha(2)-HS glycoprotein concentration with the syndrome of hemolysis, elevated liver enzymes, and low platelet count. *J Reprod Immunol* 2007; 73: 172–179
- 204 Pawelec M, Palczynski B, Karmowski A. HELLP syndrome in pregnancies below 26th week. *J Matern Fetal Neonatal Med* 2012; 25: 467–470
- 205 Reimer T, Rohrmann H, Stubert J et al. Angiogenic factors and acute-phase proteins in serum samples of preeclampsia and HELLP patients: a matched-pair analysis. *J Matern Fetal Neonatal Med* 2013; 26: 263–269
- 206 Martin JN jr., Rose CH, Briery CM. Understanding and managing HELLP syndrome: the integral role of aggressive glucocorticoids for mother and child. *Am J Obstet Gynecol* 2006; 195: 914–934
- 207 Fischer T, Wildt L. Glukokortikoide und HELLP-Syndrom. *Der Gynäkologe* 1999; 32: 783–790
- 208 Rath W, Bartz C. Therapeutisches Vorgehen bei schwerer Präeklampsie und beim HELLP-Syndrom. *Zentralbl Gynakol* 2004; 126: 293–298
- 209 Gul A, Cebeci A, Aslan H et al. Perinatal outcomes in severe preeclampsia-eclampsia with and without HELLP syndrome. *Gynecol Obstet Invest* 2005; 59: 113–118
- 210 Bartz C, Rath W. Aktuelles Management beim HELLP-Syndrom. *Gynäkolog Geburtshilfliche Rundsch* 2007; 47: 215–221
- 211 Magann EF, Bass D, Chauhan SP et al. Antepartum corticosteroids: disease stabilization in patients with the syndrome of hemolysis, elevated liver enzymes, and low platelets (HELLP). *Am J Obstet Gynecol* 1994; 171: 1148–1153
- 212 Van Pampus MG, Wolf H, Westenberg SM et al. Maternal and perinatal outcome after expectant management of the HELLP syndrome compared with pre-eclampsia without HELLP syndrome. *Eur J Obstet Gynecol Reprod Biol* 1998; 76: 31–36
- 213 Fischer T, Krause M, Beinder E et al. Schwangerschaftsverlängerung bei Patientinnen mit HELLP-Syndrom. *Geburtsh Frauenheilk* 1999; 59: 335–345
- 214 van Runnard Heimel PJ, Huisjes AJ, Franx A et al. A randomised placebo-controlled trial of prolonged prednisolone administration to patients with HELLP syndrome remote from term. *Eur J Obstet Gynecol Reprod Biol* 2006; 128: 187–193
- 215 Beitins IZ, Bayard F, Ances IG et al. The transplacental passage of prednisone and prednisolone in pregnancy near term. *J Pediatr* 1972; 81: 936–945
- 216 Blanford AT, Murphy BE. In vitro metabolism of prednisolone, dexamethasone, betamethasone, and cortisol by the human placenta. *Am J Obstet Gynecol* 1977; 127: 264–267
- 217 Ballard PL, Granberg P, Ballard RA. Glucocorticoid levels in maternal and cord serum after prenatal betamethasone therapy to prevent respiratory distress syndrome. *J Clin Invest* 1975; 56: 1548–1554
- 218 O'Brien JM, Milligan DA, Barton JR. Impact of high-dose corticosteroid therapy for patients with HELLP (hemolysis, elevated liver enzymes, and low platelet count) syndrome. *Am J Obstet Gynecol* 2000; 183: 921–924
- 219 Magann EF, Perry KG jr., Meydrech EF et al. Postpartum corticosteroids: accelerated recovery from the syndrome of hemolysis, elevated liver enzymes, and low platelets (HELLP). *Am J Obstet Gynecol* 1994; 171: 1154–1158
- 220 Vigil-De Gracia P, García-Cáceres E. Dexamethasone in the post-partum treatment of HELLP syndrome. *Int J Gynaecol Obstet* 1997; 59: 217–221
- 221 Yalcin OT, Sener T, Hassa H et al. Effects of postpartum corticosteroids in patients with HELLP syndrome. *Int J Gynaecol Obstet* 1998; 61: 141–148
- 222 Martin JN jr., Perry KG jr., Blake PG et al. Better maternal outcomes are achieved with dexamethasone therapy for postpartum HELLP (hemolysis, elevated liver enzymes, and thrombocytopenia) syndrome. *Am J Obstet Gynecol* 1997; 177: 1011–1017
- 223 Tompkins MJ, Thiagarajah S. HELLP (hemolysis, elevated liver enzymes, and low platelet count) syndrome: the benefit of corticosteroids. *Am J Obstet Gynecol* 1999; 181: 304–309
- 224 O'Brien JM, Milligan DA, Barton JR. Impact of high-dose corticosteroid therapy for patients with HELLP (hemolysis, elevated liver enzymes, and low platelet count) syndrome. *Am J Obstet Gynecol* 2000; 183: 921–924
- 225 Schlembach D, Munz W, Fischer T. Effect of corticosteroids on HELLP syndrome: a case report. *J Perinat Med* 2000; 28: 502–505
- 226 Isler CM, Barrilleaux PS, Magann EF et al. A prospective, randomized trial comparing the efficacy of dexamethasone and betamethasone for the treatment of antepartum HELLP (hemolysis, elevated liver enzymes, and low platelet count) syndrome. *Am J Obstet Gynecol* 2001; 184: 1332–1337
- 227 Mecacci F, Carignani L, Cioni R et al. Time course of recovery and complications of HELLP syndrome with two different treatments: heparin or dexamethasone. *Thromb Res* 2001; 102: 99–105
- 228 Varol F, Aydin T, Gucer F. HELLP syndrome and postpartum corticosteroids. *Int J Gynaecol Obstet* 2001; 73: 157–159
- 229 O'Brien JM, Shumate SA, Satchwell SL et al. Maternal benefit of corticosteroid therapy in patients with HELLP (hemolysis, elevated liver enzymes, and low platelet count) syndrome: impact on the rate of regional anesthesia. *Am J Obstet Gynecol* 2002; 186: 475–479
- 230 Crane JM, Tabarsi B, Hutchens D. The maternal benefits of corticosteroids with HELLP (hemolysis, elevated liver enzymes, low platelet count) syndrome. *J Obstet Gynaecol Can* 2003; 25: 650–655
- 231 Isler CM, Magann EF, Rinehart BK et al. Dexamethasone compared with betamethasone for glucocorticoid treatment of postpartum HELLP syndrome. *Int J Gynaecol Obstet* 2003; 80: 291–297
- 232 Martin JN jr., Thigpen BD, Rose CH et al. Maternal benefit of high-dose intravenous corticosteroid therapy for HELLP syndrome. *Am J Obstet Gynecol* 2003; 189: 830–834
- 233 Fonseca JE, Méndez F, Cataño C et al. Dexamethasone treatment does not improve the outcome of women with HELLP syndrome: a double-blind, placebo-controlled, randomized clinical trial. *Am J Obstet Gynecol* 2005; 193: 1591–1598

- 234 *Woudstra DM, Chandra S, Hofmeyr GJ et al.* Corticosteroids for HELLP (hemolysis, elevated liver enzymes, low platelets) syndrome in pregnancy. *Cochrane Database Syst Rev* 2010; 9: CD008148
- 235 *Sullivan CA, Magann EF, Perry KG jr. et al.* The recurrence risk of the syndrome of hemolysis, elevated liver enzymes, and low platelets (HELLP) in subsequent gestations. *Am J Obstet Gynecol* 1994; 171: 940-943
- 236 *Van Pampus MG, Wolf H, Mayruhu G et al.* Long-term follow-up in patients with a history of (H)HELLP syndrome. *Hypertens Pregnancy* 2001; 20: 15-23

## Leitlinienprogramm

### Herausgeber

Federführende Fachgesellschaften

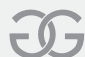

#### Deutsche Gesellschaft für Gynäkologie und Geburtshilfe e. V. (DGGG)

Repräsentanz der DGGG und Fachgesellschaften  
Hausvogteiplatz 12  
10117 Berlin  
info@dggg.de  
<http://www.dggg.de/>

#### Präsident der DGGG

Prof. Dr. med. Diethelm Wallwiener  
Universitätsfrauenklinik Tübingen  
Calwerstraße 7  
72076 Tübingen

#### DGGG-Leitlinienbeauftragter

Prof. Dr. med. Matthias W. Beckmann  
Universitätsklinikum Erlangen-Nürnberg  
Frauenklinik  
Universitätsstraße 21-23  
91054 Erlangen

#### Leitlinienkoordination

Dr. med. Paul Gaß, Tobias Brodkorb, Marion Gebhardt  
Universitätsklinikum Erlangen-Nürnberg  
Frauenklinik  
Universitätsstraße 21-23  
91054 Erlangen  
fk-dggg-leitlinien@uk-erlangen.de  
<http://www.dggg.de/leitlinienstellungennahmen>

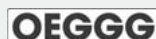

#### Österreichische Gesellschaft für Gynäkologie und Geburtshilfe (OEGGG)

Innrain 66A/5. Stock  
A-6020 Innsbruck  
stephanie.leutgeb@oeggg.at  
<http://www.oeggg.at>

#### Präsident der OEGGG

Prof. Dr. med. Uwe Lang  
Universitätsklinik für Frauenheilkunde und Geburtshilfe Graz  
Auenbruggerplatz 14  
A-8036 Graz

#### OEGGG-Leitlinienbeauftragter

Prof. Dr. med. Karl Tamussino  
Universitätsklinik für Frauenheilkunde und Geburtshilfe Graz  
Auenbruggerplatz 14  
A-8036 Graz

#### gynécologie suisse

#### Schweizerische Gesellschaft für Gynäkologie und Geburtshilfe (SGGG)

Gynécologie Suisse SGGG  
Altenbergstraße 29  
Postfach 6  
CH-3000 Bern 8  
sekretariat@sggg.ch  
<http://www.sggg.ch/>

#### Präsident der SGGG

Dr. med. David Ehm  
FMH für Geburtshilfe und Gynäkologie  
Nägeligasse 13  
CH-3011 Bern

#### SGGG-Leitlinienbeauftragter

Prof. Dr. med. Daniel Surbek  
Universitätsklinik für Frauenheilkunde  
Geburtshilfe und feto-maternale Medizin  
Inselspital Bern  
Effingerstraße 102  
CH-3010 Bern
